# Supplementary material
Source: PubMed Central journal article supplement (PMC8408860)
Supplement: noab131_suppl_supplementary_materials.pdf [file noab131_suppl_supplementary_materials.pdf]

## Supplementary Methods

The linear mixed effect model for fitting volume outcomes may be written as:

$$\begin{aligned}
 V_{ID,t_j,s} = & \beta_{t_j}^{P14} + \beta_{t_j}^{P23} + \beta_{t_j}^{P42} + \beta_{t_j}^{P98} + \beta_{sex}s + \\
 & \beta_{7Gy}^P + \beta_{Met}^P + \beta_{7Gy,Met}^P + \\
 & \beta_{Age:7Gy}^P(t_j - 23) + \beta_{Age:Met}^P(t_j - 23) + \beta_{Age:7Gy:Met}^P(t_j - 23) + \\
 & \beta_{sex:7Gy}^P s + \beta_{sex:Met}^P s + \beta_{sex:7Gy:Met}^P s + \\
 & \beta_{Age:sex:7Gy}^P s(t_j - 23) + \beta_{Age:sex:Met}^P s(t_j - 23) + \beta_{Age:sex:7Gy:Met}^P s(t_j - 23) + \\
 & \gamma_{ID}
 \end{aligned}$$

where  $ID$  indicates mouse identification,  $t_j$  represents time point, and  $s$  represents sex (+0.5 for females, -0.5 for males). The  $\beta$  terms all represent fixed effects. Coefficients with superscript  $P14$ ,  $P23$ ,  $P42$  and  $P98$  apply only at the indicated timepoint. Those with superscript  $P$  apply after commencement of treatment (i.e., at P23, P42 and P98). Coefficients with subscript  $7Gy$  apply in mice receiving 7Gy only. Similarly,  $Met$  indicates coefficients applying only to mice who received metformin, with a distinct coefficient used for the MET16 and MET19 conditions. Terms with subscript  $Age$  represent linear growth with age, with origin centered on  $t_o$  (adjusted to P23 or P98 so that the “intercept” coefficients represent differences at the respective time point). Terms with subscript  $sex$  represent differences between males and females (with positive larger in females and negative larger in males). The  $\gamma_{ID}$  term represents a random effect for each mouse. The “:” indicates interaction coefficients, and were the basis for generation of Figures 4 and 5 in the results.

## Supplementary Figures

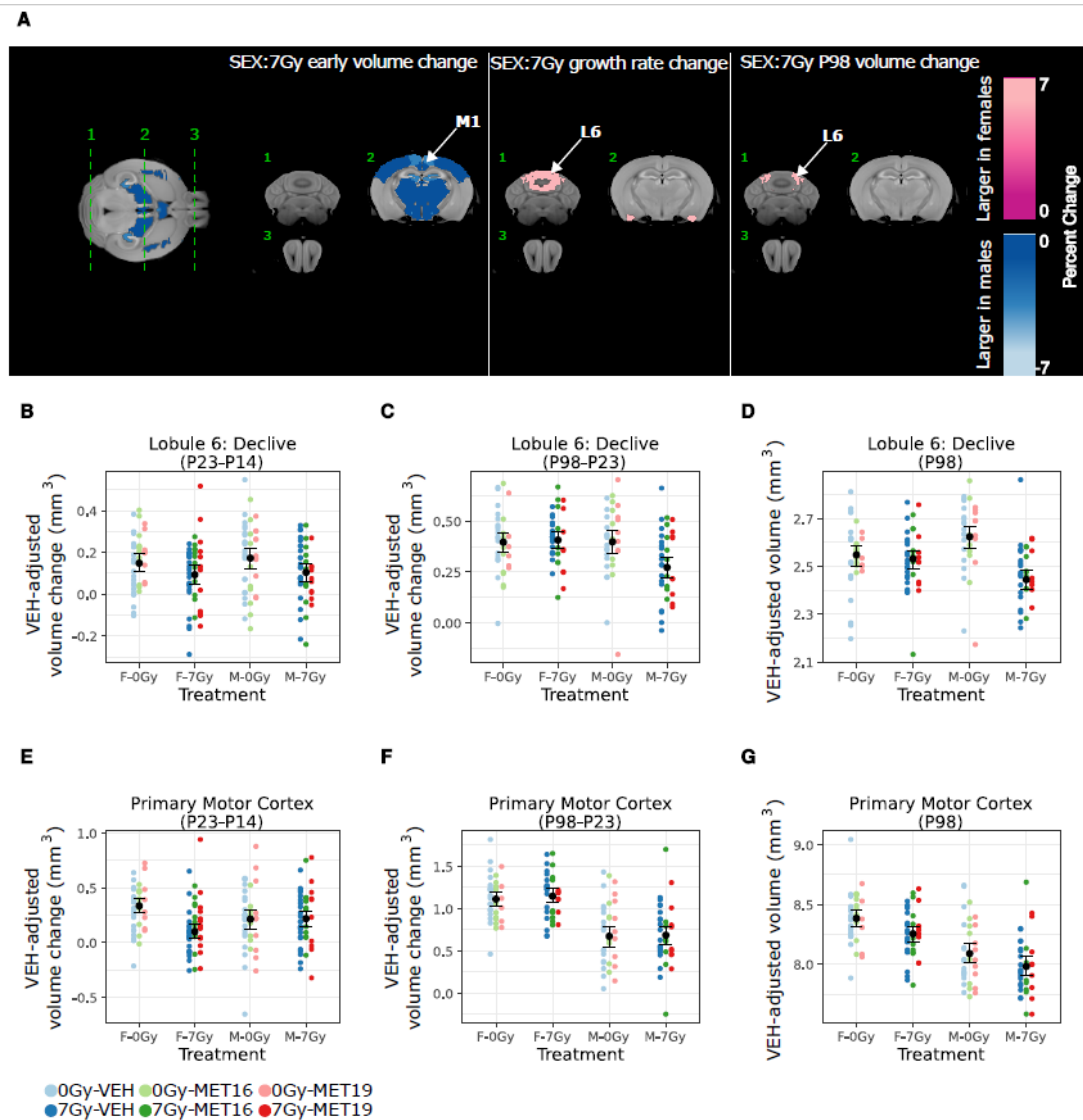

### Supplementary Figure S.1 Sex-dependent differences in brain development after irradiation.

Comparison of neuroanatomical outcomes in males and females after irradiation were evaluated based on the interaction of sex and radiation (SEX:7Gy). In (A), a colour map shows all structures that had a significant volume difference in radiation-induced volume change between males and females (FDR<10%). In (B-G), individual plots compare structure volumes between sexes, evaluating early (P23-P14) and long-term (P98-P23) volume differences, and the final P98 volumes. To better visualize the contribution of sex on radiation across all groups in

these plots, volumes were plotted after adjustments to subtract the fitted metformin treatment effects. At the early time point (A, E), a larger volume was observed in irradiated males relative to irradiated females in several regions including the primary motor cortex, shown in (E,F,G). On the other hand, an increased long-term growth was observed in females in some structures, predominantly cerebellar regions including lobule 6, which resulted in a significant increase in volume at P98 compared to males. Black points and error bars represent the mean volume and bootstrapped 95% confidence intervals. Small coloured dots represent individual structure volumes after subtraction of metformin treatment effects. Abbreviation: L6 = Lobule 6: Declive, M1 = Primary Motor Cortex, VEH = treated with vehicle, MET16 = treated with metformin at P16, MET19 = treated with metformin at P19, 0Gy = unirradiated, 7Gy = irradiated with a 7 Gy dose.

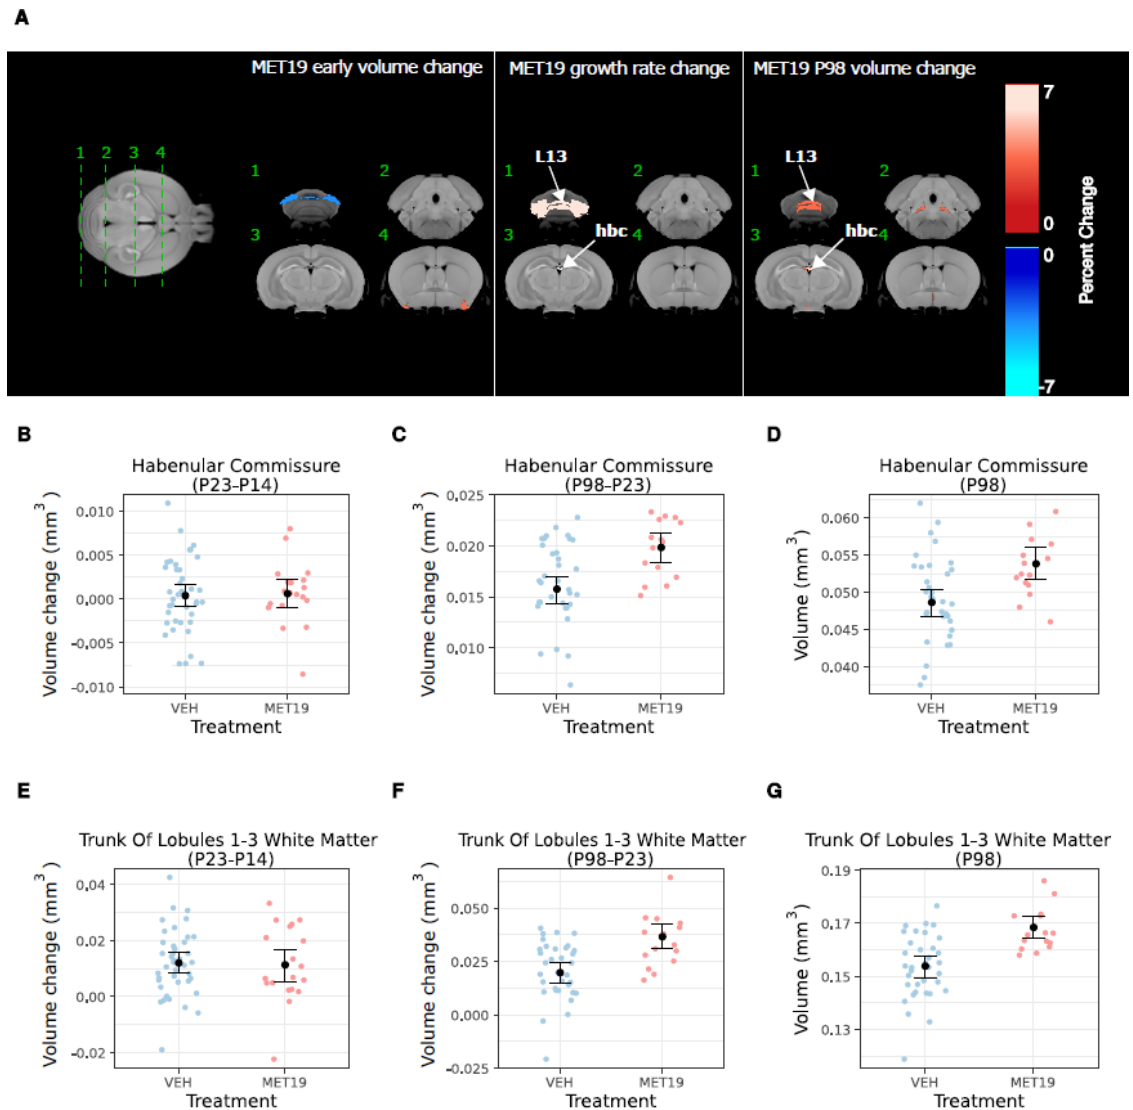

**Supplementary Figure S.2** The impact of delayed metformin treatment on brain development.

In (A), a colour map overlay shows all structures that had a significant volume difference in MET19-treated mice compared to VEH-treated mice (FDR<10%). Slice position matches Figure 3. There was a subtle effect of MET19 on the brain in 0-Gy mice at P23 (early). Enhanced growth rate was observed in regions of the cerebellum, and habenular commissure, leading to increased volumes by P98. Representative plots of the habenular commissure (B,C,D) and trunk of lobules 1-3 white matter (cerebellum) (E,F,G) show no significant early volume change as visualized by the P23-P14 volume difference in (B,E). Increased growth rate and long-term

outcome is significantly increased in both structures, as shown by the P98-P23 volume differences (C,F). This results in increased volume by the final P98 time point (D,G). Treatment effects within the fitted model are represented as the average of males and females. Black points and error bars represent the mean volume and bootstrapped 95% confidence intervals. Smaller coloured dots represent individual brain volumes. Abbreviation: hbc = habenular commissure, trunk of lobules 1-3 white matter = L13, VEH = treated with vehicle, MET19 = treated with metformin at P19, for 14 days.

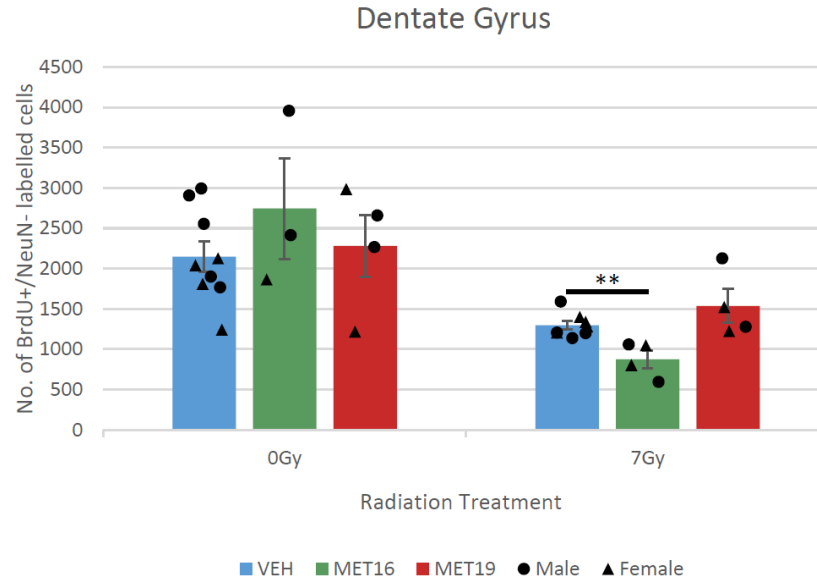

**Supplementary Figure S.3** BrdU-positive, NeuN-negative cell counts within the dentate gyrus of the hippocampus for unirradiated (VEH-0Gy, n=9; MET16-0Gy, n=3, MET19-0Gy, n=4) or irradiated (VEH-7Gy, n=8; MET16-7Gy, n=4, MET19-7Gy, n=4) mice. A significant decrease in BrdU-positive, NeuN-negative cells is observed with MET16 treatment in irradiated mice compared to VEH controls (\*\* p<0.01, Student's t test). Coloured bars represent means, whereas small black circles and triangles represent individual male or female mice, respectively. Error bars are SEM. Abbreviation: VEH = treated with vehicle, MET16 = treated with metformin at P16, MET19 = treated with metformin at P19, 0Gy = unirradiated, 7Gy = irradiated with a 7 Gy dose.

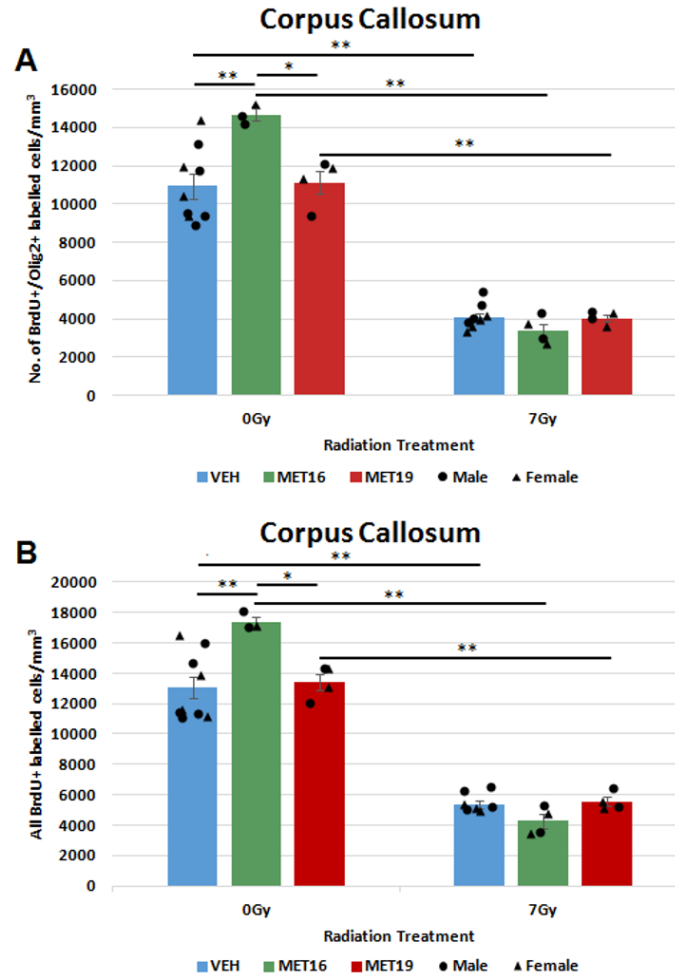

**Supplementary Figure S.4** Within the corpus callosum (A, B), there is loss of proliferative (BrdU-positive) cells and new-born/proliferative oligodendrocytes (BrdU/Olig2-positive) at 42 days of age after irradiation. An increase in BrdU-positive and BrdU/Olig2-positive cells is observed with MET16 mice compared with VEH control and MET19 mice. A significant decrease in BrdU-positive and BrdU/Olig2-positive cells is seen in irradiated mice in all 3 groups compared to non-irradiated controls. Coloured bars represent means and black circles and triangles represent individual male and female mice respectively. Error bars are SEM.

Abbreviation: VEH = treated with vehicle, MET16 = treated with metformin at P16, MET19 = treated with metformin at P19. (\*p < 0.01, \*\*p < 0.001, two-way ANOVA with Bonferroni post-hoc analysis).

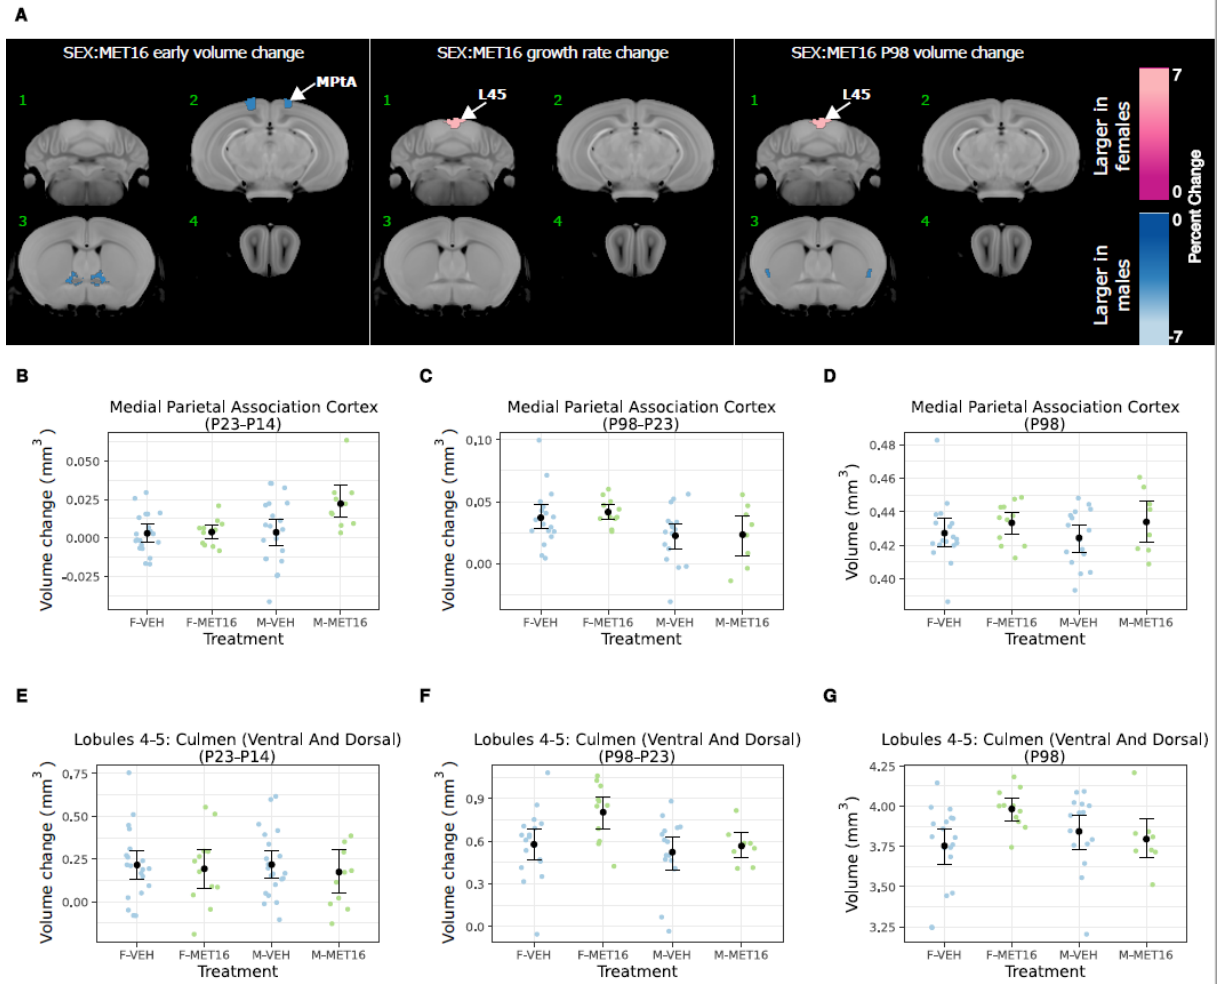

**Supplementary Figure S.5** The impact of sex differences in metformin treatment on brain development. In (A), a colour map overlay shows all structures that had a significant volume difference in MET16-treated mice compared to VEH-treated mice (FDR<10%). Slice position matches Figure 3. Comparison of neuroanatomical outcomes in males and females after metformin treatment were evaluated based on the interaction of sex and metformin (SEX:MET16). In (A), a colour map shows all structures that had a significant volume difference in metformin-induced volume change between males and females (FDR<10%). In (B-G), individual plots compare structure volumes between sexes, evaluating early (P23), growth rate (P98-P23), and P98 differences. Presented are representative plots of the medial parietal association cortex (MPtA) (B,C,D) and lobules 4-5:culmen (L45) (E,F,G). At the early time point, a



relatively larger volume was observed in metformin-treated males in the MPtA (B). An increased growth rate is observed in L45 in females (F), resulting in an increased volume by the final P98 time point (G). Treatment effects within the fitted model are represented as the average of males and females. Black points and error bars represent the mean volume and bootstrapped 95% confidence intervals. Smaller coloured dots represent individual brain volumes. Abbreviation: MPtA = medial parietal association cortex, L45 = lobules 4-5:culmen of the cerebellum, VEH = treated with vehicle, MET16 = treated with metformin at P16, for 14 days.

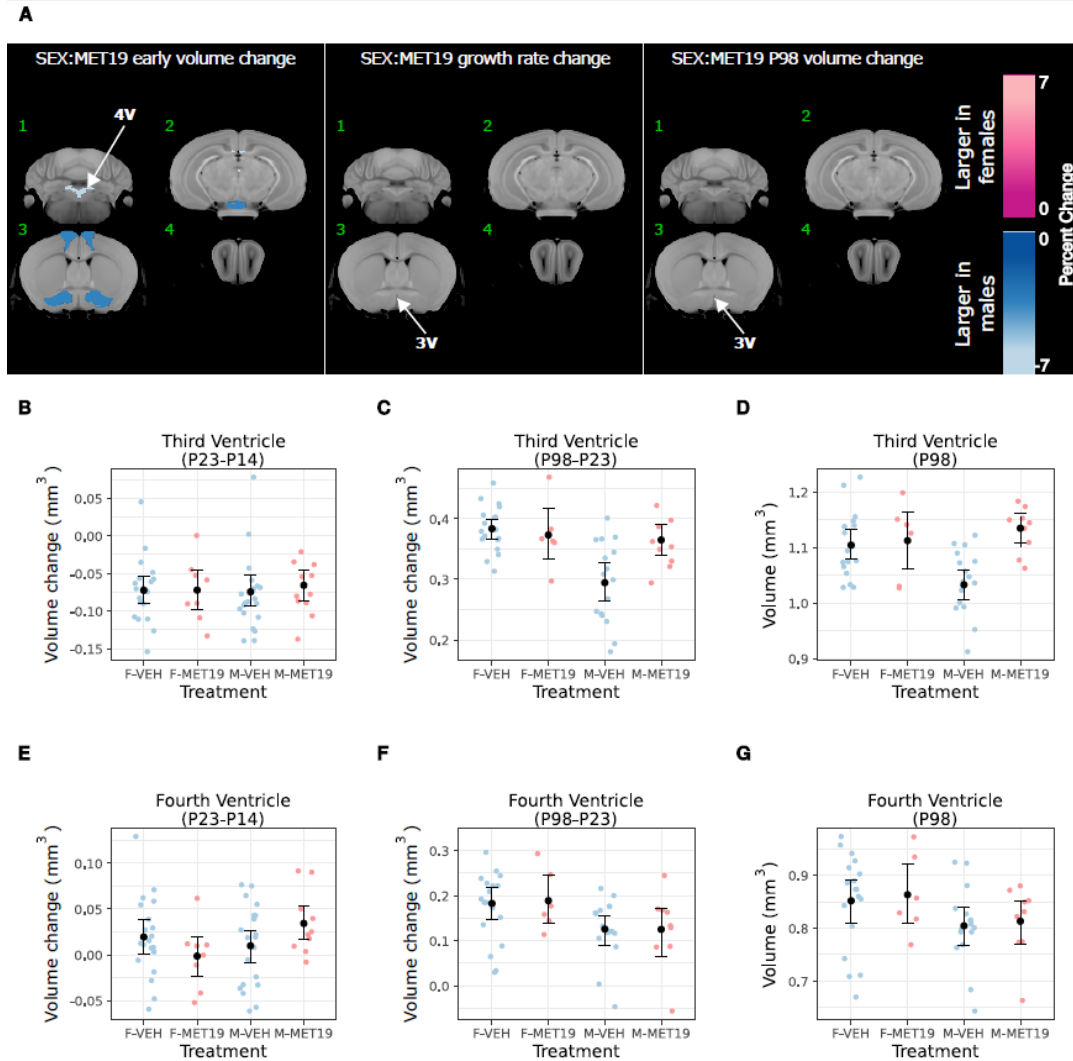

**Supplementary Figure S.6** The impact of sex differences in delayed metformin treatment on brain development. In (A), a colour map overlay shows all structures that had a significant volume difference in MET19-treated mice compared to VEH-treated mice (FDR<10%). Slice position matches Figure 3. Comparison of neuroanatomical outcomes in males and females after metformin treatment were evaluated based on the interaction of sex and metformin (SEX:MET19). In (A), a colour map shows all structures that had a significant volume difference in metformin-induced volume change between males and females (FDR<10%). In (B-G), individual plots compare structure volumes between sexes, evaluating early (P23), growth rate

(P98-P23), and P98 differences. Representative plots of the third ventricle (B,C,D) and fourth ventricle (E,F,G). At the early time point, a relatively larger volume was observed in metformin-treated males in the fourth ventricle (E). An increased growth rate is observed in the third ventricle in males (C), resulting in an increased volume by the final P98 time point (D). Treatment effects within the fitted model are represented as the average of males and females. Black points and error bars represent the mean volume and bootstrapped 95% confidence intervals. Smaller coloured dots represent individual brain volumes. Abbreviation: 3V = third ventricle, 4V = fourth ventricle, VEH = treated with vehicle, MET19 = treated with metformin at P19, for 14 days.

## Supplementary Tables

| Structure                                       | $\beta_{70y}$ | $\rho_{70y}$ | $q_{70y}$ | $\beta_{70y:Growth}$ | $\rho_{70y:Growth}$ | $q_{70y:Growth}$ | $\beta_{SEK70y}$ | $\rho_{SEK70y}$ | $q_{SEK70y}$ | $\beta_{SEK70y:Growth}$ | $\rho_{SEK70y:Growth}$ | $q_{SEK70y:Growth}$ |
|-------------------------------------------------|---------------|--------------|-----------|----------------------|---------------------|------------------|------------------|-----------------|--------------|-------------------------|------------------------|---------------------|
| Amygdala                                        | -0.15         | 0.0046       | 0.023     | -0.0015              | 0.11                | 0.28             | -0.12            | 0.11            | 0.26         | 0.0033                  | 0.056                  | 0.17                |
| Anterior Commissure: Pars Anterior              | -0.046        | 2.7e-09      | 2e-08     | -1e-04               | 0.46                | 0.65             | 0.0016           | 0.88            | 0.95         | -0.00035                | 0.18                   | 0.36                |
| Anterior Commissure: Pars Posterior             | -0.015        | 5.1e-09      | 3.8e-08   | 3.6e-05              | 0.44                | 0.63             | -5e-04           | 0.89            | 0.95         | -6.1e-05                | 0.47                   | 0.65                |
| Basal Forebrain                                 | -0.091        | 0.0015       | 0.0085    | 0.00022              | 0.68                | 0.82             | -0.068           | 0.1             | 0.25         | 0.00083                 | 0.38                   | 0.57                |
| Bed Nucleus Of Stria Terminalis                 | -0.043        | 1.5e-07      | 1.1e-06   | 7.9e-05              | 0.6                 | 0.76             | -0.026           | 0.028           | 0.1          | 5.8e-05                 | 0.83                   | 0.91                |
| Cerebellar Peduncle: Inferior                   | -0.018        | 0.0035       | 0.018     | 0.00021              | 0.087               | 0.23             | -0.0083          | 0.35            | 0.56         | 0.00046                 | 0.032                  | 0.12                |
| Cerebellar Peduncle: Middle                     | -0.055        | 7.2e-08      | 5.2e-07   | 9.2e-06              | 0.96                | 0.98             | -0.015           | 0.32            | 0.52         | 0.00041                 | 0.23                   | 0.43                |
| Cerebellar Peduncle: Superior                   | -0.038        | 1.4e-08      | 1e-07     | -3.8e-05             | 0.76                | 0.87             | -0.011           | 0.25            | 0.46         | 4e-04                   | 0.072                  | 0.2                 |
| Cerebral Aqueduct                               | -0.033        | 4.2e-09      | 3.2e-08   | 0.00011              | 0.34                | 0.54             | -0.009           | 0.27            | 0.48         | -2e-04                  | 0.3                    | 0.51                |
| Cerebral Peduncle                               | -0.13         | 1.7e-21      | 1.6e-20   | -0.00011             | 0.64                | 0.79             | -0.024           | 0.2             | 0.39         | 1e-04                   | 0.81                   | 0.9                 |
| Colliculus: Inferior                            | -0.15         | 1.7e-06      | 1.2e-05   | -0.00039             | 0.54                | 0.71             | -0.06            | 0.2             | 0.39         | 0.0019                  | 0.093                  | 0.24                |
| Colliculus: Superior                            | -0.36         | 5.1e-06      | 3.5e-05   | 0.00033              | 0.83                | 0.91             | -0.2             | 0.083           | 0.22         | 0.0036                  | 0.19                   | 0.38                |
| Corpus Callosum                                 | -0.43         | 1.7e-10      | 1.3e-09   | -0.00089             | 0.45                | 0.63             | -0.12            | 0.22            | 0.41         | 0.00076                 | 0.72                   | 0.85                |
| Corticospinal Tract/Pyramids                    | -0.043        | 4.7e-06      | 3.2e-05   | 1.1e-05              | 0.95                | 0.98             | -0.024           | 0.08            | 0.22         | 5e-04                   | 0.11                   | 0.27                |
| Cuneate Nucleus                                 | -0.0027       | 0.11         | 0.27      | 7.2e-07              | 0.98                | 0.99             | -0.0027          | 0.29            | 0.5          | 0.00013                 | 0.041                  | 0.14                |
| Dentate Gyrus Of Hippocampus                    | -0.12         | 6.2e-11      | 4.9e-10   | -0.00058             | 0.09                | 0.23             | -0.066           | 0.016           | 0.067        | 0.00095                 | 0.13                   | 0.3                 |
| Facial Nerve (Cranial Nerve 7)                  | -0.0051       | 0.0028       | 0.015     | 9.8e-06              | 0.78                | 0.88             | -0.0027          | 0.28            | 0.49         | 9.3e-05                 | 0.13                   | 0.3                 |
| Fasciculus Retroflexus                          | -0.0072       | 2.1e-06      | 1.5e-05   | -2.9e-05             | 0.3                 | 0.51             | -0.0042          | 0.053           | 0.17         | 2.7e-05                 | 0.58                   | 0.75                |
| Fimbria                                         | -0.2          | 4.3e-18      | 3.7e-17   | -0.00058             | 0.16                | 0.35             | -0.046           | 0.16            | 0.35         | 0.00036                 | 0.63                   | 0.79                |
| Formix                                          | -0.025        | 8.4e-13      | 6.8e-12   | -6.2e-05             | 0.31                | 0.51             | -0.012           | 0.011           | 0.048        | 1.2e-05                 | 0.92                   | 0.96                |
| Fourth Ventricle                                | -0.026        | 0.0018       | 0.0099    | 0.00031              | 0.068               | 0.19             | -0.02            | 0.11            | 0.26         | 4e-04                   | 0.18                   | 0.37                |
| Fundus Of Striatum                              | -0.0025       | 0.0016       | 0.0088    | 2.1e-06              | 0.89                | 0.95             | 0.00048          | 0.67            | 0.81         | -1.7e-05                | 0.52                   | 0.7                 |
| Globus Pallidus                                 | -0.17         | 9.7e-22      | 8.9e-21   | 0.00039              | 0.2                 | 0.4              | -0.025           | 0.31            | 0.52         | 0.00041                 | 0.45                   | 0.64                |
| Habenular Commissure                            | -0.0037       | 1.3e-06      | 9e-06     | 3.6e-06              | 0.8                 | 0.9              | -0.00031         | 0.78            | 0.89         | -1e-05                  | 0.69                   | 0.83                |
| Hippocampus                                     | -0.53         | 3.4e-08      | 2.5e-07   | -0.0034              | 0.043               | 0.14             | -0.24            | 0.082           | 0.22         | 0.0036                  | 0.24                   | 0.44                |
| Hypothalamus                                    | -0.3          | 1.7e-08      | 1.2e-07   | -0.00097             | 0.3                 | 0.51             | -0.22            | 0.0049          | 0.024        | 0.00033                 | 0.85                   | 0.92                |
| Inferior Olivary Complex                        | -0.0056       | 5.3e-06      | 3.6e-05   | 4.4e-05              | 0.069               | 0.2              | -0.001           | 0.56            | 0.74         | 7.3e-05                 | 0.088                  | 0.23                |
| Internal Capsule                                | -0.21         | 1.6e-27      | 1.5e-26   | 0.00035              | 0.28                | 0.49             | -0.02            | 0.44            | 0.63         | 0.00022                 | 0.71                   | 0.84                |
| Interpeduncular Nucleus                         | -0.007        | 0.00091      | 0.0054    | -3.6e-05             | 0.37                | 0.57             | -0.0011          | 0.72            | 0.85         | 4.4e-05                 | 0.54                   | 0.72                |
| Lateral Olfactory Tract                         | -0.025        | 1.1e-09      | 8.8e-09   | -0.00025             | 0.00077             | 0.0046           | -0.003           | 0.62            | 0.78         | 5.5e-05                 | 0.69                   | 0.82                |
| Lateral Septum                                  | -0.076        | 3.1e-06      | 2.2e-05   | -0.00045             | 0.11                | 0.28             | -0.054           | 0.021           | 0.082        | 0.00047                 | 0.36                   | 0.56                |
| Lateral Ventricle                               | -0.18         | 1.7e-07      | 1.3e-06   | -0.0018              | 0.0043              | 0.022            | -0.064           | 0.18            | 0.38         | 0.0016                  | 0.17                   | 0.35                |
| Mammillary Bodies                               | -0.011        | 0.00075      | 0.0045    | -0.00024             | 0.00014             | 0.00088          | -0.0033          | 0.49            | 0.68         | -0.00017                | 0.12                   | 0.29                |
| Mammillothalamic Tract                          | -0.0042       | 0.0031       | 0.017     | 5.2e-07              | 0.98                | 0.99             | -0.0042          | 0.04            | 0.13         | -2.5e-05                | 0.59                   | 0.76                |
| Medial Lemniscus/Medial Longitudinal Fasciculus | -0.11         | 2.4e-10      | 1.9e-09   | -0.00016             | 0.61                | 0.77             | -0.035           | 0.15            | 0.33         | 7e-04                   | 0.2                    | 0.4                 |
| Medial Septum                                   | -0.02         | 0.0018       | 0.01      | 7e-05                | 0.54                | 0.71             | -0.012           | 0.2             | 0.4          | 4.7e-05                 | 0.82                   | 0.91                |
| Medulla                                         | -0.58         | 0.0011       | 0.0065    | 0.00031              | 0.93                | 0.97             | -0.34            | 0.19            | 0.39         | 0.012                   | 0.045                  | 0.15                |
| Midbrain                                        | -0.56         | 5.4e-14      | 4.4e-13   | -0.0021              | 0.1                 | 0.26             | -0.19            | 0.064           | 0.19         | 0.0019                  | 0.41                   | 0.61                |
| Nucleus Accumbens                               | -0.073        | 0.0035       | 0.018     | -3.4e-05             | 0.94                | 0.98             | -0.0053          | 0.88            | 0.95         | -0.00014                | 0.87                   | 0.94                |
| Olfactory Bulbs                                 | -1            | 5.8e-13      | 4.7e-12   | -0.016               | 1.4e-09             | 1.1e-08          | -0.021           | 0.92            | 0.96         | 0.0015                  | 0.76                   | 0.87                |
| Olfactory Tubercle                              | -0.03         | 0.19         | 0.38      | -0.00028             | 0.52                | 0.7              | 0.0051           | 0.88            | 0.94         | 9.3e-05                 | 0.9                    | 0.96                |
| Optic Tract                                     | -0.085        | 2.4e-22      | 2.2e-21   | 1e-04                | 0.51                | 0.69             | -0.023           | 0.06            | 0.18         | 0.00032                 | 0.25                   | 0.45                |
| Periaqueductal Grey                             | -0.15         | 5.1e-08      | 3.7e-07   | 9.9e-06              | 0.99                | 0.99             | -0.072           | 0.08            | 0.22         | 0.00028                 | 0.77                   | 0.88                |
| Pons                                            | -0.56         | 1.8e-06      | 1.3e-05   | 0.0017               | 0.44                | 0.63             | -0.31            | 0.072           | 0.2          | 0.0092                  | 0.022                  | 0.084               |
| Pontine Nucleus                                 | -0.026        | 1.1e-05      | 7.3e-05   | 3e-05                | 0.79                | 0.89             | -0.016           | 0.058           | 0.18         | 0.00041                 | 0.041                  | 0.14                |
| Posterior Commissure                            | -0.0054       | 2e-05        | 0.00013   | -2.4e-05             | 0.31                | 0.52             | -0.0038          | 0.038           | 0.13         | 2.5e-05                 | 0.56                   | 0.73                |
| Pre-Para Subiculum                              | -0.025        | 0.12         | 0.28      | -4e-04               | 0.18                | 0.37             | -0.036           | 0.12            | 0.29         | 0.00058                 | 0.28                   | 0.48                |
| Stratum Granulosum Of Hippocampus               | -0.036        | 4.1e-12      | 3.3e-11   | -8.6e-05             | 0.36                | 0.56             | -0.018           | 0.016           | 0.065        | 0.00028                 | 0.1                    | 0.25                |
| Stria Medullaris                                | -0.029        | 1.6e-07      | 1.2e-06   | 5.7e-05              | 0.58                | 0.75             | -0.011           | 0.18            | 0.37         | 5.1e-05                 | 0.78                   | 0.89                |
| Stria Terminalis                                | -0.068        | 5.5e-31      | 5.3e-30   | 0.00012              | 0.23                | 0.43             | -0.011           | 0.18            | 0.37         | -2.8e-05                | 0.88                   | 0.94                |
| Striatum                                        | -0.63         | 6.4e-08      | 4.7e-07   | 0.00027              | 0.9                 | 0.95             | -0.21            | 0.2             | 0.4          | 0.0023                  | 0.53                   | 0.71                |
| Subependymale Zone / Rhinocoele                 | -0.00026      | 0.59         | 0.75      | -2.7e-05             | 0.0038              | 0.019            | 0.0012           | 0.089           | 0.23         | -3.2e-05                | 0.057                  | 0.18                |
| Superior Olivary Complex                        | -0.017        | 0.00038      | 0.0024    | 0.00012              | 0.2                 | 0.4              | -0.014           | 0.051           | 0.16         | 2e-04                   | 0.23                   | 0.44                |

| Structure                                         | $\beta_{7Qy}$ | $P_{7Qy}$ | $q_{7Qy}$ | $\beta_{7QyGrowth}$ | $P_{7QyGrowth}$ | $q_{7QyGrowth}$ | $\beta_{SEK7Qy}$ | $P_{SEK7Qy}$ | $q_{SEK7Qy}$ | $\beta_{SEK7QyGrowth}$ | $P_{SEK7QyGrowth}$ | $q_{SEK7QyGrowth}$ |
|---------------------------------------------------|---------------|-----------|-----------|---------------------|-----------------|-----------------|------------------|--------------|--------------|------------------------|--------------------|--------------------|
| Thalamus                                          | -0.59         | 2.9e-08   | 2.2e-07   | -0.00068            | 0.72            | 0.85            | -0.36            | 0.019        | 0.076        | 0.0018                 | 0.59               | 0.76               |
| Third Ventricle                                   | -0.035        | 0.00056   | 0.0034    | -0.00033            | 0.091           | 0.24            | -0.014           | 0.35         | 0.55         | -3.7e-05               | 0.92               | 0.96               |
| Ventral Tegmental Decussation                     | -0.0059       | 6.1e-07   | 4.4e-06   | -2.6e-05            | 0.25            | 0.45            | -0.001           | 0.55         | 0.72         | 2.3e-05                | 0.57               | 0.74               |
| Lobules 1-2: Lingula And Central Lobule (Ventral) | -0.084        | 4.3e-06   | 3e-05     | 0.00032             | 0.35            | 0.55            | -0.023           | 0.39         | 0.59         | -0.00099               | 0.11               | 0.27               |
| Lobule 3: Central Lobule (Dorsal)                 | -0.054        | 0.004     | 0.021     | -0.00039            | 0.32            | 0.52            | -0.018           | 0.53         | 0.71         | 7.6e-05                | 0.91               | 0.96               |
| Lobules 4-5: Culmen (Ventral And Dorsal)          | -0.059        | 0.075     | 0.21      | -7e-04              | 0.3             | 0.5             | -0.07            | 0.16         | 0.34         | 0.0034                 | 0.0046             | 0.023              |
| Lobule 6: Declive                                 | -0.052        | 0.018     | 0.074     | -0.00051            | 0.25            | 0.46            | -0.018           | 0.58         | 0.75         | 0.0019                 | 0.016              | 0.065              |
| Lobule 7: Tuber (Or Folium)                       | -0.015        | 0.073     | 0.2       | -0.00013            | 0.46            | 0.65            | -0.00016         | 0.99         | 1            | 0.00021                | 0.51               | 0.7                |
| Lobule 8: Pyramis                                 | -0.015        | 0.33      | 0.53      | -0.00058            | 0.066           | 0.19            | -0.017           | 0.45         | 0.64         | -0.00028               | 0.62               | 0.78               |
| Lobule 9: Uvula                                   | -0.028        | 0.21      | 0.41      | -0.00076            | 0.11            | 0.26            | -0.049           | 0.15         | 0.33         | 0.00074                | 0.38               | 0.58               |
| Lobule 10: Nodulus                                | -0.012        | 0.39      | 0.59      | 0.00025             | 0.39            | 0.59            | -0.028           | 0.18         | 0.37         | 0.00082                | 0.12               | 0.28               |
| Anterior Lobule (Lobules 4-5)                     | -0.041        | 0.00016   | 0.001     | -0.00025            | 0.26            | 0.47            | -0.024           | 0.13         | 0.3          | 0.00022                | 0.57               | 0.74               |
| Simple Lobule (Lobule 6)                          | -0.073        | 0.0068    | 0.032     | -0.00016            | 0.77            | 0.88            | -0.018           | 0.64         | 0.8          | 0.0013                 | 0.17               | 0.36               |
| Crus 1: Ansiform Lobule (Lobule 6)                | -0.091        | 0.0014    | 0.0081    | 2.2e-05             | 0.97            | 0.99            | -0.022           | 0.61         | 0.77         | 0.00019                | 0.067              | 0.19               |
| Crus 2: Ansiform Lobule (Lobule 7)                | -0.069        | 0.0077    | 0.036     | -0.00049            | 0.35            | 0.55            | -0.014           | 0.71         | 0.84         | 0.0018                 | 0.05               | 0.16               |
| Paramedian Lobule (Lobule 7)                      | -0.092        | 0.012     | 0.051     | -0.00047            | 0.52            | 0.7             | -0.028           | 0.6          | 0.77         | 0.0014                 | 0.3                | 0.5                |
| Copula: Pyramis (Lobule 8)                        | -0.057        | 0.0035    | 0.018     | 3.7e-05             | 0.92            | 0.97            | -0.018           | 0.54         | 0.72         | 0.00089                | 0.21               | 0.4                |
| Flocculus (Fl)                                    | -0.013        | 0.071     | 0.2       | 5.9e-05             | 0.67            | 0.81            | -0.01            | 0.34         | 0.54         | 0.00044                | 0.083              | 0.22               |
| Paraflocculus (Pfl)                               | 0.011         | 0.78      | 0.89      | 0.00014             | 0.85            | 0.93            | -0.14            | 0.012        | 0.054        | 0.0019                 | 0.16               | 0.34               |
| Trunk Of Arbor Vita                               | -0.12         | 0.00051   | 0.0031    | 8e-04               | 0.24            | 0.44            | -0.073           | 0.14         | 0.32         | 0.0022                 | 0.075              | 0.21               |
| Lobule 1-2 White Matter                           | -0.0041       | 0.0021    | 0.012     | 1.5e-05             | 0.53            | 0.71            | -0.00082         | 0.67         | 0.81         | -7e-05                 | 0.11               | 0.28               |
| Lobule 3 White Matter                             | -0.0078       | 0.0035    | 0.018     | -3.6e-05            | 0.52            | 0.7             | -0.00061         | 0.88         | 0.94         | -3.7e-05               | 0.71               | 0.84               |
| Trunk Of Lobules 1-3 White Matter                 | -0.0057       | 0.0016    | 0.0093    | 3.2e-06             | 0.93            | 0.97            | -0.0023          | 0.4          | 0.6          | -2.2e-05               | 0.73               | 0.85               |
| Lobules 4-5 White Matter                          | -0.013        | 0.059     | 0.18      | -0.00019            | 0.18            | 0.37            | -0.012           | 0.23         | 0.43         | 0.00037                | 0.14               | 0.32               |
| Lobules 6-7 White Matter                          | -0.013        | 0.054     | 0.17      | -0.00021            | 0.13            | 0.3             | -0.0088          | 0.38         | 0.58         | 4e-04                  | 0.11               | 0.26               |
| Lobule 8 White Matter                             | -0.00089      | 0.42      | 0.62      | -4e-05              | 0.078           | 0.21            | -0.0016          | 0.32         | 0.53         | -2.5e-06               | 0.95               | 0.98               |
| Trunk Of Lobules 6-8 White Matter                 | -0.0011       | 0.3       | 0.51      | -2.7e-05            | 0.23            | 0.43            | -0.0024          | 0.13         | 0.3          | 1.6e-05                | 0.69               | 0.83               |
| Lobule 9 White Matter                             | -0.0022       | 0.35      | 0.55      | -9.4e-05            | 0.058           | 0.18            | -0.0055          | 0.12         | 0.29         | 7.5e-05                | 0.39               | 0.59               |
| Lobule 10 White Matter                            | 9.9e-06       | 0.99      | 1         | 8.7e-06             | 0.71            | 0.84            | -0.0015          | 0.38         | 0.58         | 5.1e-05                | 0.22               | 0.42               |
| Anterior Lobule White Matter                      | -0.0026       | 0.0049    | 0.024     | -3e-05              | 0.1             | 0.25            | -0.0025          | 0.07         | 0.2          | 1.6e-05                | 0.63               | 0.79               |
| Simple Lobule White Matter                        | -0.0089       | 0.0057    | 0.028     | -1.7e-05            | 0.79            | 0.89            | -0.0022          | 0.65         | 0.8          | 9e-05                  | 0.44               | 0.63               |
| Crus 1 White Matter                               | -0.012        | 0.00084   | 0.005     | 2.5e-05             | 0.73            | 0.85            | -0.0058          | 0.29         | 0.49         | 0.00023                | 0.082              | 0.22               |
| Trunk Of Simple And Crus 1 White Matter           | -0.0056       | 0.00058   | 0.0035    | -8.5e-06            | 0.8             | 0.89            | -0.0023          | 0.34         | 0.54         | 6e-05                  | 0.31               | 0.51               |
| Crus 2 White Matter                               | -0.0049       | 0.052     | 0.16      | -4.3e-05            | 0.4             | 0.6             | -0.0016          | 0.68         | 0.81         | 0.00015                | 0.11               | 0.26               |
| Paramedian Lobule                                 | -0.0034       | 0.021     | 0.082     | -1.3e-05            | 0.67            | 0.81            | -6e-04           | 0.78         | 0.88         | 6.8e-05                | 0.19               | 0.38               |
| Trunk Of Crus 2 And Paramedian White Matter       | -0.0085       | 0.0051    | 0.025     | 3.8e-05             | 0.54            | 0.72            | -0.0014          | 0.75         | 0.86         | 0.00016                | 0.14               | 0.32               |
| Copula White Matter                               | -0.0018       | 0.031     | 0.11      | -9.3e-06            | 0.58            | 0.75            | -0.0013          | 0.29         | 0.5          | 2.8e-05                | 0.35               | 0.56               |
| Paraflocculus White Matter                        | 0.00062       | 0.84      | 0.92      | 2.2e-05             | 0.71            | 0.84            | -0.0066          | 0.15         | 0.33         | 0.00018                | 0.096              | 0.24               |
| Flocculus White Matter                            | -0.0012       | 0.033     | 0.12      | 1.1e-05             | 0.32            | 0.52            | -0.00038         | 0.65         | 0.8          | 2.6e-05                | 0.18               | 0.37               |
| Dentate Nucleus                                   | -0.0096       | 0.00061   | 0.0037    | 0.00011             | 0.055           | 0.17            | -0.0054          | 0.2          | 0.4          | 0.00027                | 0.0098             | 0.044              |
| Nucleus Interpositus                              | -0.013        | 0.005     | 0.025     | 0.00016             | 0.087           | 0.23            | -0.0082          | 0.23         | 0.44         | 0.00039                | 0.022              | 0.087              |
| Fastigial Nucleus                                 | -0.0094       | 0.025     | 0.094     | 9.8e-05             | 0.26            | 0.46            | -0.0098          | 0.12         | 0.28         | 0.00028                | 0.063              | 0.19               |
| Cingulate Cortex: Area 24A                        | -0.021        | 0.095     | 0.24      | -0.00055            | 0.016           | 0.067           | -0.023           | 0.21         | 0.41         | 2.1e-05                | 0.96               | 0.98               |
| Cingulate Cortex: Area 24A'                       | 0.0026        | 0.6       | 0.77      | -9.8e-05            | 0.3             | 0.5             | -0.017           | 0.017        | 0.071        | -4.8e-05               | 0.77               | 0.88               |
| Cingulate Cortex: Area 24B                        | -0.009        | 0.38      | 0.58      | -0.00015            | 0.44            | 0.63            | -0.032           | 0.035        | 0.12         | 7e-05                  | 0.84               | 0.92               |
| Cingulate Cortex: Area 24B'                       | -0.0033       | 0.44      | 0.63      | -2.2e-06            | 0.98            | 0.99            | -0.017           | 0.0061       | 0.029        | 0.00015                | 0.31               | 0.51               |
| Cingulate Cortex: Area 25                         | -0.0065       | 0.045     | 0.15      | -4.8e-05            | 0.41            | 0.61            | 0.00045          | 0.92         | 0.97         | 1.2e-05                | 0.91               | 0.96               |
| Cingulate Cortex: Area 29A                        | -0.0055       | 0.5       | 0.68      | -0.00014            | 0.39            | 0.59            | -0.026           | 0.031        | 0.11         | 0.00052                | 0.067              | 0.19               |
| Cingulate Cortex: Area 29B                        | -0.0048       | 0.19      | 0.38      | -1.1e-05            | 0.87            | 0.94            | -0.0084          | 0.11         | 0.27         | 0.00024                | 0.05               | 0.16               |
| Cingulate Cortex: Area 29C                        | 0.016         | 0.17      | 0.35      | -0.00041            | 0.071           | 0.2             | -0.035           | 0.042        | 0.14         | 0.00055                | 0.17               | 0.36               |
| Cingulate Cortex: Area 30                         | -0.0076       | 0.7       | 0.83      | -3e-04              | 0.41            | 0.61            | -0.038           | 0.18         | 0.37         | 0.0014                 | 0.032              | 0.11               |
| Cingulate Cortex: Area 32                         | 0.015         | 0.43      | 0.63      | 0.00029             | 0.41            | 0.61            | -0.027           | 0.33         | 0.53         | 0.00036                | 0.57               | 0.74               |
| Amygdalopiriform Transition Area                  | -0.021        | 0.00014   | 0.00091   | -0.00015            | 0.18            | 0.37            | -0.0033          | 0.69         | 0.82         | 0.00031                | 0.11               | 0.27               |

| Structure                                         | $\beta_{7Gy}$ | $P_{7Gy}$ | $q_{7Gy}$ | $\beta_{7GyGrowth}$ | $P_{7GyGrowth}$ | $q_{7GyGrowth}$ | $\beta_{SEX:7Gy}$ | $P_{SEX:7Gy}$ | $q_{SEX:7Gy}$ | $\beta_{SEX:7GyGrowth}$ | $P_{SEX:7GyGrowth}$ | $q_{SEX:7GyGrowth}$ |
|---------------------------------------------------|---------------|-----------|-----------|---------------------|-----------------|-----------------|-------------------|---------------|---------------|-------------------------|---------------------|---------------------|
| Primary Auditory Cortex                           | -0.022        | 0.012     | 0.053     | -9.6e-05            | 0.56            | 0.73            | -0.012            | 0.33          | 0.53          | 0.00029                 | 0.33                | 0.53                |
| Secondary Auditory Cortex: Dorsal Area            | -0.025        | 0.0098    | 0.044     | 3.2e-05             | 0.86            | 0.93            | -0.022            | 0.12          | 0.28          | 4e-04                   | 0.21                | 0.41                |
| Secondary Auditory Cortex: Ventral Area           | -0.03         | 0.014     | 0.058     | -0.00028            | 0.22            | 0.42            | -0.01             | 0.56          | 0.73          | 0.00039                 | 0.34                | 0.55                |
| Caudomedial Entorhinal Cortex                     | -0.11         | 0.0089    | 0.041     | -0.0016             | 0.038           | 0.13            | -0.044            | 0.47          | 0.65          | 0.00039                 | 0.78                | 0.88                |
| Cingulum                                          | -0.024        | 2.1e-06   | 1.5e-05   | -0.00012            | 0.19            | 0.38            | -0.012            | 0.1           | 0.26          | 0.00012                 | 0.44                | 0.63                |
| Clastrum                                          | -0.0074       | 0.01      | 0.046     | 8.4e-05             | 0.13            | 0.31            | -0.0014           | 0.74          | 0.86          | 2.6e-06                 | 0.98                | 0.99                |
| Cortex-Amygdala Transition Zones                  | -8e-04        | 0.9       | 0.95      | 7.2e-06             | 0.95            | 0.98            | -0.003            | 0.74          | 0.86          | 0.00013                 | 0.55                | 0.73                |
| Clastrum: Dorsal Part                             | -0.0049       | 0.0032    | 0.017     | -1.1e-06            | 0.97            | 0.99            | -0.0034           | 0.16          | 0.34          | 1.4e-05                 | 0.8                 | 0.89                |
| Dorsal Nucleus Of The Endopiriform                | -0.021        | 0.0023    | 0.013     | -0.00012            | 0.34            | 0.54            | -0.0028           | 0.78          | 0.88          | -0.00011                | 0.62                | 0.78                |
| Dorsal Intermediate Entorhinal Cortex             | -0.038        | 0.0016    | 0.0089    | -5e-04              | 0.027           | 0.098           | -0.0078           | 0.65          | 0.8           | 0.00082                 | 0.044               | 0.15                |
| Dorsolateral Entorhinal Cortex                    | -0.035        | 0.023     | 0.087     | -0.00066            | 0.019           | 0.076           | -0.0083           | 0.71          | 0.84          | 0.00095                 | 0.062               | 0.18                |
| Dorsolateral Orbital Cortex                       | -0.02         | 0.014     | 0.061     | 0.00026             | 0.12            | 0.29            | -0.0074           | 0.54          | 0.72          | 0.00029                 | 0.33                | 0.53                |
| Dorsal Tenia Tecta                                | -0.0089       | 0.046     | 0.15      | -0.00017            | 0.033           | 0.12            | -0.00014          | 0.98          | 0.99          | 3.9e-05                 | 0.79                | 0.89                |
| Ectorhinal Cortex                                 | -0.042        | 0.0048    | 0.024     | -0.00042            | 0.12            | 0.29            | 0.00037           | 0.86          | 0.94          | 0.00045                 | 0.36                | 0.56                |
| Frontal Cortex: Area 3                            | -0.016        | 0.0011    | 0.0062    | 7.3e-05             | 0.42            | 0.61            | -0.01             | 0.13          | 0.3           | 0.00014                 | 0.38                | 0.58                |
| Frontal Association Cortex                        | -0.14         | 0.027     | 0.1       | 0.002               | 0.11            | 0.28            | -0.13             | 0.17          | 0.35          | 0.0035                  | 0.12                | 0.28                |
| Intermediate Nucleus Of The Endopiriform Clastrum | -0.0062       | 0.061     | 0.18      | -3.3e-05            | 0.62            | 0.78            | 0.0019            | 0.7           | 0.83          | -0.00015                | 0.2                 | 0.4                 |
| Insular Region: Not Subdivided                    | -0.11         | 0.0088    | 0.04      | 3.8e-05             | 0.96            | 0.98            | -0.1              | 0.095         | 0.24          | 0.00044                 | 0.75                | 0.87                |
| Lateral Orbital Cortex                            | -0.005        | 0.88      | 0.94      | 0.0011              | 0.085           | 0.23            | -0.049            | 0.3           | 0.51          | 0.0019                  | 0.093               | 0.24                |
| Lateral Parietal Association Cortex               | -0.0029       | 0.057     | 0.17      | 1.7e-05             | 0.57            | 0.74            | -0.0046           | 0.036         | 0.13          | 0.00013                 | 0.01                | 0.046               |
| Primary Motor Cortex                              | -0.13         | 0.0041    | 0.021     | 7.9e-05             | 0.92            | 0.97            | -0.17             | 0.0073        | 0.034         | 0.0013                  | 0.39                | 0.58                |
| Secondary Motor Cortex                            | -0.084        | 0.034     | 0.12      | -0.00045            | 0.54            | 0.72            | -0.16             | 0.0067        | 0.032         | 0.0012                  | 0.36                | 0.56                |
| Medial Entorhinal Cortex                          | -0.022        | 0.00072   | 0.0043    | -9.9e-05            | 0.43            | 0.62            | -0.007            | 0.46          | 0.65          | 0.00018                 | 0.41                | 0.61                |
| Medial Orbital Cortex                             | 0.042         | 0.0075    | 0.035     | 0.00031             | 0.31            | 0.51            | 0.00031           | 0.89          | 0.95          | 0.00085                 | 0.12                | 0.29                |
| Medial Parietal Association Cortex                | -0.0037       | 0.21      | 0.41      | 3.6e-05             | 0.53            | 0.71            | -0.0085           | 0.051         | 0.16          | 0.00027                 | 0.0095              | 0.043               |
| Piriform Cortex                                   | -0.14         | 0.007     | 0.033     | -0.00012            | 0.24            | 0.45            | -0.027            | 0.73          | 0.85          | -0.00027                | 0.88                | 0.94                |
| Posterolateral Cortical Amygdaloid Area           | -0.014        | 0.091     | 0.24      | -0.00022            | 0.19            | 0.38            | -0.015            | 0.22          | 0.42          | 0.00076                 | 0.01                | 0.046               |
| Posteromedial Cortical Amygdaloid Area            | -0.03         | 0.00048   | 0.0029    | -0.00023            | 0.14            | 0.32            | -0.017            | 0.17          | 0.36          | 0.00059                 | 0.04                | 0.14                |
| Perirhinal Cortex                                 | -0.035        | 0.012     | 0.053     | -0.00052            | 0.047           | 0.15            | -0.0029           | 0.89          | 0.95          | 0.00055                 | 0.24                | 0.44                |
| Parietal Cortex: Posterior Area: Rostral Part     | -0.001        | 0.12      | 0.28      | 8.5e-06             | 0.49            | 0.68            | -0.0019           | 0.045         | 0.15          | 4.3e-05                 | 0.055               | 0.17                |
| Rostral Amygdalopiriform Area                     | -0.0068       | 0.08      | 0.22      | -8e-05              | 0.31            | 0.51            | -0.0024           | 0.67          | 0.81          | 0.00028                 | 0.042               | 0.14                |
| Primary Somatosensory Cortex                      | -0.086        | 0.00073   | 0.0044    | 0.00022             | 0.65            | 0.8             | -0.075            | 0.042         | 0.14          | 0.00098                 | 0.25                | 0.45                |
| Primary Somatosensory Cortex: Barrel Field        | -0.15         | 0.0038    | 0.019     | -0.00079            | 0.41            | 0.61            | -0.17             | 0.022         | 0.084         | 0.0022                  | 0.2                 | 0.39                |
| Primary Somatosensory Cortex: Dysgranular Zone    | -0.0058       | 0.0047    | 0.024     | 1e-05               | 0.79            | 0.89            | -0.0074           | 0.013         | 0.056         | 7.9e-05                 | 0.25                | 0.45                |
| Primary Somatosensory Cortex: Forelimb Region     | -0.082        | 0.0017    | 0.0095    | -0.00019            | 0.7             | 0.83            | -0.093            | 0.014         | 0.06          | 0.00089                 | 0.31                | 0.51                |
| Primary Somatosensory Cortex: Hindlimb Region     | -0.045        | 0.013     | 0.055     | -0.00014            | 0.68            | 0.81            | -0.061            | 0.019         | 0.077         | 7e-04                   | 0.25                | 0.45                |
| Primary Somatosensory Cortex: Jaw Region          | -0.016        | 0.00043   | 0.0027    | 4e-05               | 0.63            | 0.79            | -0.015            | 0.018         | 0.071         | 0.00017                 | 0.26                | 0.47                |
| Primary Somatosensory Cortex: Shoulder Region     | -0.0029       | 0.077     | 0.21      | -2.8e-05            | 0.36            | 0.56            | -0.004            | 0.095         | 0.24          | 6.7e-05                 | 0.22                | 0.42                |
| Primary Somatosensory Cortex: Trunk Region        | -0.0057       | 0.11      | 0.26      | 1.9e-05             | 0.78            | 0.88            | -0.011            | 0.037         | 0.13          | 0.00022                 | 0.068               | 0.2                 |
| Primary Somatosensory Cortex: Upper Lip Region    | -0.091        | 0.0019    | 0.011     | -0.00025            | 0.64            | 0.79            | -0.11             | 0.013         | 0.056         | 0.0021                  | 0.031               | 0.11                |
| Secondary Somatosensory Cortex                    | -0.11         | 8e-04     | 0.0048    | -0.00038            | 0.53            | 0.71            | -0.088            | 0.067         | 0.19          | 0.0018                  | 0.089               | 0.23                |
| Temporal Association Area                         | -0.036        | 0.04      | 0.13      | -0.00052            | 0.11            | 0.27            | 0.008             | 0.76          | 0.87          | 0.00041                 | 0.48                | 0.67                |
| Primary Visual Cortex                             | -0.017        | 0.34      | 0.54      | -0.00033            | 0.33            | 0.53            | -0.024            | 0.36          | 0.56          | 0.00083                 | 0.17                | 0.35                |
| Primary Visual Cortex: Binocular Area             | -0.02         | 0.13      | 0.29      | 0.00012             | 0.61            | 0.77            | -0.03             | 0.12          | 0.28          | 0.00069                 | 0.12                | 0.28                |
| Primary Visual Cortex: Monocular Area             | -0.024        | 0.093     | 0.24      | 0.00022             | 0.4             | 0.6             | -0.039            | 0.058         | 0.18          | 0.0011                  | 0.017               | 0.071               |
| Secondary Visual Cortex: Lateral Area             | -0.018        | 0.3       | 0.51      | -0.00025            | 0.44            | 0.63            | -0.022            | 0.39          | 0.59          | 0.00053                 | 0.37                | 0.57                |
| Secondary Visual Cortex: Mediolateral Area        | -0.011        | 0.14      | 0.32      | 6.7e-05             | 0.64            | 0.79            | -0.02             | 0.064         | 0.19          | 0.00061                 | 0.017               | 0.069               |
| Secondary Visual Cortex: Mediomedial Area         | -0.015        | 0.36      | 0.56      | -0.00014            | 0.65            | 0.8             | -0.024            | 0.32          | 0.52          | 0.001                   | 0.065               | 0.19                |
| Clastrum: Ventral Part                            | -0.01         | 0.0098    | 0.044     | -9.4e-06            | 0.89            | 0.95            | -0.0095           | 0.086         | 0.23          | -2.9e-05                | 0.81                | 0.9                 |
| Ventral Nucleus Of The Endopiriform Clastrum      | -0.0075       | 0.0063    | 0.03      | -5.3e-05            | 0.29            | 0.5             | -0.001            | 0.79          | 0.89          | 4.6e-05                 | 0.61                | 0.77                |
| Ventral Intermediate Entorhinal Cortex            | -0.031        | 0.00012   | 0.00081   | -0.00024            | 0.12            | 0.29            | -0.0091           | 0.44          | 0.63          | 0.00052                 | 0.059               | 0.18                |
| Ventral Orbital Cortex                            | 0.013         | 0.24      | 0.45      | 0.00022             | 0.28            | 0.48            | -0.01             | 0.51          | 0.69          | 0.00047                 | 0.2                 | 0.4                 |
| Ventral Tenia Tecta                               | -0.0023       | 0.0035    | 0.018     | -1.3e-05            | 0.41            | 0.61            | -0.00053          | 0.65          | 0.8           | 4.1e-05                 | 0.14                | 0.31                |

**Supplementary Table S.1** Table of 159 segmented atlas structures affected by irradiation.

Columns of the table contain information for the coefficient estimates for age, radiation, sex, interaction terms and corresponding test statistics: p value (p) and FDR adjusted p values (q).

| Structure                                       | $\beta_{MET16}$ | $P_{MET16}$ | $Q_{MET16}$ | $\beta_{MET16:Growth}$ | $P_{MET16:Growth}$ | $Q_{MET16:Growth}$ | $\beta_{MET16:Gy}$ | $P_{MET16:Gy}$ | $Q_{MET16:Gy}$ |
|-------------------------------------------------|-----------------|-------------|-------------|------------------------|--------------------|--------------------|--------------------|----------------|----------------|
| Amygdala                                        | -0.121          | 0.0599      | 0.18        | 0.0014                 | 0.221              | 0.419              | -0.0799            | 0.374          | 0.573          |
| Anterior Commissure: Pars Anterior              | -0.00391        | 0.68        | 0.818       | 0.000362               | 0.0379             | 0.13               | -0.0232            | 0.0804         | 0.218          |
| Anterior Commissure: Pars Posterior             | 1.83e-05        | 0.995       | 0.997       | 0.000167               | 0.00358            | 0.0185             | -0.00355           | 0.402          | 0.598          |
| Basal Forebrain                                 | -0.0308         | 0.382       | 0.58        | 0.0018                 | 0.00478            | 0.0237             | -0.085             | 0.0845         | 0.226          |
| Bed Nucleus Of Stria Terminalis                 | -0.00204        | 0.837       | 0.919       | 9.39e-05               | 0.604              | 0.768              | -0.0239            | 0.0852         | 0.228          |
| Cerebellar Peduncle: Inferior                   | 0.00875         | 0.244       | 0.45        | 0.000242               | 0.0996             | 0.251              | -0.0168            | 0.109          | 0.267          |
| Cerebellar Peduncle: Middle                     | 0.0106          | 0.389       | 0.587       | 0.000187               | 0.425              | 0.618              | -0.0363            | 0.0364         | 0.126          |
| Cerebellar Peduncle: Superior                   | -0.0108         | 0.182       | 0.372       | 7.01e-05               | 0.644              | 0.796              | -0.0169            | 0.135          | 0.307          |
| Cerebral Aqueduct                               | 0.0103          | 0.128       | 0.296       | 0.000142               | 0.291              | 0.497              | -0.0117            | 0.217          | 0.414          |
| Cerebral Peduncle                               | 0.00372         | 0.813       | 0.903       | 9.27e-05               | 0.742              | 0.859              | -0.0373            | 0.0903         | 0.235          |
| Colliculus: Inferior                            | -0.0411         | 0.29        | 0.497       | 0.000507               | 0.503              | 0.686              | -0.0927            | 0.0889         | 0.233          |
| Colliculus: Superior                            | -0.0233         | 0.807       | 0.9         | 0.000878               | 0.633              | 0.79               | -0.171             | 0.2            | 0.396          |
| Corpus Callosum                                 | -0.0178         | 0.825       | 0.91        | 0.00062                | 0.664              | 0.807              | -0.321             | 0.00461        | 0.0231         |
| Corticospinal Tract/Pyramids                    | -0.00107        | 0.926       | 0.967       | 0.000332               | 0.12               | 0.285              | -0.0351            | 0.0287         | 0.105          |
| Cuneate Nucleus                                 | 0.00162         | 0.445       | 0.634       | 6.09e-05               | 0.158              | 0.343              | -0.00541           | 0.0692         | 0.198          |
| Dentate Gyrus Of Hippocampus                    | 0.0215          | 0.352       | 0.554       | 1.63e-05               | 0.969              | 0.988              | -0.089             | 0.00601        | 0.0289         |
| Facial Nerve (Cranial Nerve 7)                  | 0.00142         | 0.5         | 0.684       | 5.41e-05               | 0.196              | 0.392              | -0.00416           | 0.157          | 0.342          |
| Fasciculus Retroflexus                          | -0.00195        | 0.292       | 0.497       | 2.98e-05               | 0.379              | 0.578              | -0.00488           | 0.0592         | 0.178          |
| Fimbria                                         | -0.00881        | 0.749       | 0.864       | -9.53e-05              | 0.851              | 0.927              | -0.0919            | 0.0176         | 0.0712         |
| Fornix                                          | -0.00275        | 0.507       | 0.69        | 7.33e-05               | 0.328              | 0.53               | -0.0137            | 0.0183         | 0.0733         |
| Fourth Ventricle                                | 0.0093          | 0.359       | 0.56        | 0.000644               | 0.00192            | 0.0107             | -0.0139            | 0.326          | 0.529          |
| Fundus Of Striatum                              | 0.000222        | 0.817       | 0.905       | 6.09e-05               | 0.000814           | 0.00489            | -0.000422          | 0.753          | 0.867          |
| Globus Pallidus                                 | -0.0193         | 0.362       | 0.562       | 6.92e-05               | 0.853              | 0.928              | -0.0231            | 0.434          | 0.626          |
| Habenular Commissure                            | -0.000833       | 0.374       | 0.573       | 1.54e-05               | 0.375              | 0.574              | -0.00211           | 0.108          | 0.264          |
| Hippocampus                                     | 0.0222          | 0.848       | 0.926       | 0.000492               | 0.809              | 0.901              | -0.344             | 0.0349         | 0.122          |
| Hypothalamus                                    | -0.0729         | 0.263       | 0.468       | 0.00127                | 0.266              | 0.47               | -0.152             | 0.0963         | 0.245          |
| Inferior Olivary Complex                        | -0.00173        | 0.251       | 0.456       | 5.16e-05               | 0.0783             | 0.215              | -0.00189           | 0.37           | 0.569          |
| Internal Capsule                                | 0.00575         | 0.795       | 0.892       | -3.6e-05               | 0.927              | 0.968              | -0.0558            | 0.0721         | 0.202          |
| Interpeduncular Nucleus                         | 0.00162         | 0.53        | 0.71        | 6.17e-05               | 0.206              | 0.403              | -0.00825           | 0.0229         | 0.0875         |
| Lateral Olfactory Tract                         | 0.00387         | 0.442       | 0.633       | 3.31e-05               | 0.718              | 0.845              | -0.012             | 0.0898         | 0.234          |
| Lateral Septum                                  | -0.017          | 0.392       | 0.589       | 0.000155               | 0.656              | 0.803              | -0.0526            | 0.0592         | 0.178          |
| Lateral Ventricle                               | -0.0356         | 0.383       | 0.581       | 7.38e-05               | 0.923              | 0.967              | -0.0707            | 0.215          | 0.413          |
| Mammillary Bodies                               | -0.00234        | 0.558       | 0.73        | -8.88e-05              | 0.233              | 0.436              | -0.00619           | 0.267          | 0.472          |
| Mammillothalamic Tract                          | 9.08e-05        | 0.959       | 0.982       | 6.66e-05               | 0.0347             | 0.121              | -0.00543           | 0.0269         | 0.0995         |
| Medial Lemniscus/Medial Longitudinal Fasciculus | -0.00799        | 0.697       | 0.829       | 0.000386               | 0.302              | 0.507              | -0.055             | 0.0557         | 0.172          |
| Medial Septum                                   | -0.006          | 0.437       | 0.629       | 0.000185               | 0.178              | 0.368              | -0.0177            | 0.102          | 0.255          |
| Medulla                                         | 0.0732          | 0.737       | 0.858       | 0.00823                | 0.0499             | 0.16               | -0.514             | 0.0923         | 0.238          |
| Midbrain                                        | -0.145          | 0.107       | 0.262       | 0.00101                | 0.525              | 0.707              | -0.219             | 0.0809         | 0.219          |
| Nucleus Accumbens                               | -0.0121         | 0.692       | 0.828       | 0.00143                | 0.0114             | 0.0502             | -0.0434            | 0.31           | 0.512          |
| Olfactory Bulbs                                 | 0.184           | 0.285       | 0.492       | 0.00411                | 0.202              | 0.398              | -0.791             | 0.00106        | 0.00626        |
| Olfactory Tubercle                              | 0.0285          | 0.303       | 0.507       | 0.0016                 | 0.00273            | 0.0147             | -0.0794            | 0.0407         | 0.137          |
| Optic Tract                                     | 0.000139        | 0.989       | 0.995       | 3e-04                  | 0.101              | 0.253              | -0.0286            | 0.0478         | 0.154          |
| Periaqueductal Grey                             | -0.066          | 0.056       | 0.172       | 0.000738               | 0.26               | 0.467              | -0.0352            | 0.466          | 0.653          |
| Pons                                            | 0.0372          | 0.795       | 0.892       | 0.0059                 | 0.0302             | 0.109              | -0.405             | 0.0438         | 0.145          |
| Pontine Nucleus                                 | 0.00119         | 0.868       | 0.938       | 0.000172               | 0.21               | 0.407              | -0.0123            | 0.22           | 0.418          |
| Posterior Commissure                            | -4.71e-05       | 0.976       | 0.991       | 3.81e-05               | 0.183              | 0.373              | -0.0045            | 0.0374         | 0.129          |
| Pre-Para Subiculum                              | -0.0226         | 0.249       | 0.454       | 3.49e-05               | 0.923              | 0.967              | -0.0521            | 0.0578         | 0.176          |
| Stratum Granulosum Of Hippocampus               | 0.00514         | 0.406       | 0.602       | 5.86e-05               | 0.608              | 0.772              | -0.02              | 0.021          | 0.0818         |
| Stria Medullaris                                | 0.00706         | 0.302       | 0.506       | 9.86e-05               | 0.436              | 0.628              | -0.0297            | 0.002          | 0.0111         |
| Stria Terminalis                                | -0.000144       | 0.983       | 0.993       | -1.42e-05              | 0.907              | 0.957              | -0.0218            | 0.0239         | 0.0907         |
| Striatum                                        | -0.00209        | 0.988       | 0.995       | 0.00456                | 0.0685             | 0.196              | -0.42              | 0.0338         | 0.119          |
| Subependymale Zone / Rhinocoele                 | -0.000376       | 0.518       | 0.701       | 1.2e-05                | 0.289              | 0.496              | -0.00192           | 0.0185         | 0.0742         |
| Superior Olivary Complex                        | 0.00225         | 0.696       | 0.829       | 0.000317               | 0.00544            | 0.0265             | -0.0156            | 0.0529         | 0.166          |

| Structure                                         | $\beta_{MET16}$ | $P_{MET16}$ | $Q_{MET16}$ | $\beta_{MET16-Growth}$ | $P_{MET16-Growth}$ | $Q_{MET16-Growth}$ | $\beta_{MET167Gy}$ | $P_{MET167Gy}$ | $Q_{MET167Gy}$ |
|---------------------------------------------------|-----------------|-------------|-------------|------------------------|--------------------|--------------------|--------------------|----------------|----------------|
| Thalamus                                          | -0.0123         | 0.924       | 0.967       | 0.00285                | 0.219              | 0.418              | -0.485             | 0.00752        | 0.035          |
| Third Ventricle                                   | 0.00191         | 0.877       | 0.944       | 0.000237               | 0.324              | 0.527              | -0.0379            | 0.0285         | 0.104          |
| Ventral Tegmental Decussation                     | -0.00188        | 0.196       | 0.391       | 4.27e-05               | 0.118              | 0.281              | -0.00268           | 0.188          | 0.38           |
| Lobules 1-2: Lingula And Central Lobule (Ventral) | -0.0431         | 0.0535      | 0.167       | 0.000472               | 0.264              | 0.469              | -0.00682           | 0.827          | 0.911          |
| Lobule 3: Central Lobule (Dorsal)                 | -0.011          | 0.635       | 0.79        | -0.000141              | 0.769              | 0.879              | -0.0516            | 0.113          | 0.273          |
| Lobules 4-5: Culmen (Ventral And Dorsal)          | -0.0464         | 0.259       | 0.465       | 0.00168                | 0.0401             | 0.136              | -0.0439            | 0.445          | 0.634          |
| Lobule 6: Declive                                 | -0.0255         | 0.342       | 0.543       | 0.00118                | 0.0307             | 0.111              | -0.0205            | 0.585          | 0.752          |
| Lobule 7: Tuber (Or Folium)                       | -0.00234        | 0.824       | 0.91        | 0.000352               | 0.103              | 0.256              | -0.0133            | 0.368          | 0.567          |
| Lobule 8: Pyramis                                 | 0.00291         | 0.879       | 0.944       | -0.000276              | 0.474              | 0.662              | -0.0628            | 0.0192         | 0.0762         |
| Lobule 9: Uvula                                   | -0.00298        | 0.916       | 0.963       | 0.000295               | 0.61               | 0.772              | -0.0849            | 0.0314         | 0.112          |
| Lobule 10: Nodulus                                | 0.0158          | 0.369       | 0.568       | 0.000815               | 0.0247             | 0.0931             | -0.0341            | 0.167          | 0.353          |
| Anterior Lobule (Lobules 4-5)                     | -0.0187         | 0.161       | 0.346       | 0.000127               | 0.635              | 0.79               | -0.032             | 0.0876         | 0.231          |
| Simple Lobule (Lobule 6)                          | -0.0029         | 0.93        | 0.97        | 0.00126                | 0.0567             | 0.174              | -0.0845            | 0.0691         | 0.198          |
| Crus 1: Ansiform Lobule (Lobule 6)                | 0.00539         | 0.878       | 0.944       | 0.00137                | 0.0471             | 0.153              | -0.0569            | 0.246          | 0.451          |
| Crus 2: Ansiform Lobule (Lobule 7)                | -0.00901        | 0.776       | 0.882       | 0.00128                | 0.0443             | 0.146              | -0.047             | 0.289          | 0.496          |
| Paramedian Lobule (Lobule 7)                      | -0.00677        | 0.88        | 0.945       | 0.000286               | 0.748              | 0.863              | -0.103             | 0.103          | 0.256          |
| Copula: Pyramis (Lobule 8)                        | -0.00625        | 0.794       | 0.892       | 0.000272               | 0.571              | 0.742              | -0.0345            | 0.303          | 0.507          |
| Flocculus (Fl)                                    | -0.00311        | 0.735       | 0.856       | 0.000242               | 0.158              | 0.342              | -0.00721           | 0.574          | 0.744          |
| Paraflocculus (Pfl)                               | -0.00319        | 0.947       | 0.979       | 0.00211                | 0.0191             | 0.0762             | -0.0755            | 0.263          | 0.468          |
| Trunk Of Arbor Vita                               | -0.00233        | 0.955       | 0.98        | 0.00154                | 0.0639             | 0.188              | -0.103             | 0.073          | 0.204          |
| Lobule 1-2 White Matter                           | -0.00386        | 0.0173      | 0.0706      | 1.58e-05               | 0.599              | 0.765              | 0.000309           | 0.891          | 0.95           |
| Lobule 3 White Matter                             | -0.0025         | 0.444       | 0.634       | -5.43e-05              | 0.424              | 0.618              | -0.00492           | 0.281          | 0.487          |
| Trunk Of Lobules 1-3 White Matter                 | -0.00364        | 0.102       | 0.254       | 1.43e-06               | 0.975              | 0.991              | -0.0023            | 0.46           | 0.648          |
| Lobules 4-5 White Matter                          | -0.00757        | 0.36        | 0.561       | 0.000123               | 0.481              | 0.669              | -0.013             | 0.262          | 0.467          |
| Lobules 6-7 White Matter                          | -0.00986        | 0.232       | 0.435       | 0.000243               | 0.151              | 0.332              | -0.0144            | 0.213          | 0.411          |
| Lobule 8 White Matter                             | 0.000411        | 0.762       | 0.873       | -1.08e-05              | 0.695              | 0.829              | -0.00373           | 0.0504         | 0.161          |
| Trunk Of Lobules 6-8 White Matter                 | -0.000644       | 0.614       | 0.775       | 4.4e-06                | 0.871              | 0.94               | -0.0028            | 0.118          | 0.281          |
| Lobule 9 White Matter                             | -0.00129        | 0.659       | 0.805       | 2.54e-05               | 0.673              | 0.814              | -0.00566           | 0.167          | 0.353          |
| Lobule 10 White Matter                            | 0.0014          | 0.317       | 0.519       | 6.46e-05               | 0.0257             | 0.0958             | -0.00251           | 0.201          | 0.397          |
| Anterior Lobule White Matter                      | -0.00137        | 0.225       | 0.423       | -7.31e-06              | 0.746              | 0.861              | -0.00263           | 0.0946         | 0.242          |
| Simple Lobule White Matter                        | 0.000469        | 0.906       | 0.956       | 0.000103               | 0.192              | 0.386              | -0.0108            | 0.0507         | 0.162          |
| Crus 1 White Matter                               | 0.00124         | 0.782       | 0.886       | 0.000129               | 0.148              | 0.327              | -0.0136            | 0.0311         | 0.112          |
| Trunk Of Simple And Crus 1 White Matter           | -0.00221        | 0.268       | 0.472       | 4.36e-05               | 0.28               | 0.486              | -0.00516           | 0.0647         | 0.189          |
| Crus 2 White Matter                               | -0.00162        | 0.601       | 0.767       | 8.29e-05               | 0.19               | 0.384              | -0.00674           | 0.121          | 0.286          |
| Paramedian Lobule                                 | -0.000944       | 0.597       | 0.764       | 2.93e-05               | 0.408              | 0.603              | -0.00281           | 0.261          | 0.467          |
| Trunk Of Crus 2 And Paramedian White Matter       | -0.00161        | 0.665       | 0.808       | 0.000108               | 0.154              | 0.336              | -0.00751           | 0.149          | 0.329          |
| Copula White Matter                               | -8.44e-05       | 0.934       | 0.972       | 1.72e-05               | 0.404              | 0.6                | -0.00182           | 0.202          | 0.398          |
| Paraflocculus White Matter                        | -0.000279       | 0.942       | 0.975       | 0.000123               | 0.0888             | 0.233              | -0.00291           | 0.585          | 0.752          |
| Flocculus White Matter                            | -0.000303       | 0.665       | 0.808       | 1.65e-05               | 0.205              | 0.401              | -4.35e-05          | 0.965          | 0.985          |
| Dentate Nucleus                                   | 0.00051         | 0.882       | 0.946       | 0.000164               | 0.0217             | 0.0842             | -0.00474           | 0.326          | 0.528          |
| Nucleus Interpositus                              | 0.000342        | 0.951       | 0.979       | 0.000268               | 0.0221             | 0.0854             | -0.0116            | 0.139          | 0.313          |
| Fastigial Nucleus                                 | -0.000651       | 0.899       | 0.954       | 0.000253               | 0.0156             | 0.0654             | -0.00977           | 0.175          | 0.364          |
| Cingulate Cortex: Area 24A                        | 0.0136          | 0.382       | 0.58        | -1.62e-05              | 0.953              | 0.979              | -0.0524            | 0.0161         | 0.0668         |
| Cingulate Cortex: Area 24A'                       | -0.00136        | 0.825       | 0.91        | 0.000157               | 0.172              | 0.359              | -0.0209            | 0.0157         | 0.0657         |
| Cingulate Cortex: Area 24B                        | 0.0154          | 0.222       | 0.421       | -2.25e-05              | 0.923              | 0.967              | -0.0463            | 0.0088         | 0.0403         |
| Cingulate Cortex: Area 24B'                       | 0.00287         | 0.59        | 0.757       | 9.63e-05               | 0.34               | 0.541              | -0.015             | 0.0444         | 0.146          |
| Cingulate Cortex: Area 25                         | 0.00247         | 0.537       | 0.715       | 7.99e-05               | 0.261              | 0.467              | -0.0111            | 0.0468         | 0.152          |
| Cingulate Cortex: Area 29A                        | 0.000181        | 0.985       | 0.994       | 9.39e-05               | 0.629              | 0.788              | -0.017             | 0.219          | 0.418          |
| Cingulate Cortex: Area 29B                        | 0.000878        | 0.843       | 0.922       | 2.8e-05                | 0.738              | 0.858              | -0.0112            | 0.0718         | 0.202          |
| Cingulate Cortex: Area 29C                        | -0.00677        | 0.634       | 0.79        | 0.000326               | 0.233              | 0.436              | -0.0224            | 0.26           | 0.467          |
| Cingulate Cortex: Area 30                         | 0.0109          | 0.647       | 0.797       | 0.000155               | 0.73               | 0.853              | -0.0784            | 0.0189         | 0.0757         |
| Cingulate Cortex: Area 32                         | 0.00745         | 0.748       | 0.863       | 0.000277               | 0.521              | 0.702              | -0.0496            | 0.127          | 0.294          |
| Amygdalopiriform Transition Area                  | -0.00954        | 0.161       | 0.345       | 0.000148               | 0.268              | 0.472              | -0.00201           | 0.832          | 0.915          |



| Structure                                         | $\beta_{\text{MET16}}$ | $P_{\text{MET16}}$ | $Q_{\text{MET16}}$ | $\beta_{\text{MET16:Growth}}$ | $P_{\text{MET16:Growth}}$ | $Q_{\text{MET16:Growth}}$ | $\beta_{\text{MET16:70y}}$ | $P_{\text{MET16:70y}}$ | $Q_{\text{MET16:70y}}$ |
|---------------------------------------------------|------------------------|--------------------|--------------------|-------------------------------|---------------------------|---------------------------|----------------------------|------------------------|------------------------|
| Primary Auditory Cortex                           | 0.00364                | 0.736              | 0.857              | 9.27e-05                      | 0.647                     | 0.797                     | -0.0335                    | 0.0269                 | 0.0995                 |
| Secondary Auditory Cortex: Dorsal Area            | 0.00655                | 0.577              | 0.746              | 0.000172                      | 0.427                     | 0.62                      | -0.0442                    | 0.00716                | 0.0337                 |
| Secondary Auditory Cortex: Ventral Area           | 0.0035                 | 0.812              | 0.903              | -9.3e-05                      | 0.739                     | 0.858                     | -0.0385                    | 0.0616                 | 0.183                  |
| Caudomedial Entorhinal Cortex                     | -0.0414                | 0.411              | 0.606              | -0.000385                     | 0.68                      | 0.818                     | -0.132                     | 0.0623                 | 0.184                  |
| Cingulum                                          | -0.00233               | 0.7                | 0.832              | 6.54e-05                      | 0.55                      | 0.724                     | -0.0203                    | 0.0167                 | 0.0687                 |
| Clastrum                                          | -0.00057               | 0.872              | 0.94               | 0.000208                      | 0.0026                    | 0.0141                    | -0.00516                   | 0.297                  | 0.502                  |
| Cortex: Amygdala Transition Zones                 | 0.00215                | 0.779              | 0.883              | 0.000343                      | 0.0198                    | 0.0779                    | -0.0206                    | 0.0547                 | 0.17                   |
| Clastrum: Dorsal Part                             | 0.00117                | 0.569              | 0.739              | 5.5e-05                       | 0.132                     | 0.302                     | -0.00686                   | 0.0169                 | 0.0693                 |
| Dorsal Nucleus Of The Endopiriform                | 0.000838               | 0.922              | 0.967              | 0.000476                      | 0.0018                    | 0.0101                    | -0.0171                    | 0.151                  | 0.332                  |
| Dorsal Intermediate Entorhinal Cortex             | -0.017                 | 0.245              | 0.451              | 0.00013                       | 0.638                     | 0.792                     | -0.00449                   | 0.826                  | 0.91                   |
| Dorsolateral Entorhinal Cortex                    | -0.0106                | 0.569              | 0.739              | -9.7e-05                      | 0.779                     | 0.883                     | -0.018                     | 0.489                  | 0.675                  |
| Dorsolateral Orbital Cortex                       | 0.0012                 | 0.904              | 0.956              | 0.000284                      | 0.164                     | 0.349                     | -0.0106                    | 0.447                  | 0.636                  |
| Dorsal Tenia Tecta                                | 0.00498                | 0.366              | 0.565              | 6.4e-05                       | 0.516                     | 0.699                     | -0.0169                    | 0.0285                 | 0.104                  |
| Ectorhinal Cortex                                 | 0.000646               | 0.972              | 0.989              | -0.000152                     | 0.646                     | 0.796                     | -0.0414                    | 0.104                  | 0.258                  |
| Frontal Cortex: Area 3                            | -0.000366              | 0.95               | 0.979              | 0.000149                      | 0.173                     | 0.362                     | -0.0101                    | 0.213                  | 0.411                  |
| Frontal Association Cortex                        | 0.0324                 | 0.677              | 0.816              | 0.00152                       | 0.327                     | 0.529                     | -0.132                     | 0.225                  | 0.423                  |
| Intermediate Nucleus Of The Endopiriform Clastrum | 0.00173                | 0.672              | 0.813              | 0.000303                      | 0.000166                  | 0.00106                   | -0.00706                   | 0.217                  | 0.414                  |
| Insular Region: Not Subdivided                    | 0.0355                 | 0.503              | 0.686              | 0.00188                       | 0.0476                    | 0.154                     | -0.155                     | 0.0373                 | 0.129                  |
| Lateral Orbital Cortex                            | -0.000839              | 0.983              | 0.993              | 0.00124                       | 0.116                     | 0.278                     | -0.0562                    | 0.309                  | 0.511                  |
| Lateral Parietal Association Cortex               | 0.00195                | 0.289              | 0.496              | 1.43e-05                      | 0.685                     | 0.823                     | -0.00637                   | 0.0138                 | 0.0588                 |
| Primary Motor Cortex                              | 0.026                  | 0.635              | 0.79               | 0.000601                      | 0.553                     | 0.726                     | -0.172                     | 0.0249                 | 0.0934                 |
| Secondary Motor Cortex                            | 0.0611                 | 0.211              | 0.409              | -0.000165                     | 0.853                     | 0.928                     | -0.19                      | 0.00556                | 0.027                  |
| Medial Entorhinal Cortex                          | -0.00902               | 0.264              | 0.468              | -1.56e-05                     | 0.918                     | 0.965                     | -0.0103                    | 0.363                  | 0.562                  |
| Medial Orbital Cortex                             | -0.00283               | 0.883              | 0.946              | 0.000378                      | 0.31                      | 0.512                     | -0.0286                    | 0.289                  | 0.496                  |
| Medial Parietal Association Cortex                | 0.00418                | 0.246              | 0.451              | 4.84e-05                      | 0.492                     | 0.677                     | -0.012                     | 0.0179                 | 0.072                  |
| Piriform Cortex                                   | 0.0407                 | 0.537              | 0.715              | 0.0029                        | 0.0161                    | 0.0668                    | -0.149                     | 0.106                  | 0.261                  |
| Posterolateral Cortical Amygdaloid Area           | -0.00715               | 0.494              | 0.678              | 0.000173                      | 0.388                     | 0.587                     | -0.0143                    | 0.327                  | 0.53                   |
| Posteromedial Cortical Amygdaloid Area            | -0.0198                | 0.0604             | 0.181              | -1.6e-05                      | 0.934                     | 0.972                     | -0.00718                   | 0.626                  | 0.786                  |
| Perirhinal Cortex                                 | 0.00307                | 0.86               | 0.933              | -0.000215                     | 0.499                     | 0.683                     | -0.0385                    | 0.114                  | 0.274                  |
| Parietal Cortex: Posterior Area: Rostral Part     | 0.000896               | 0.261              | 0.467              | 1.67e-05                      | 0.269                     | 0.474                     | -0.00315                   | 0.00481                | 0.0238                 |
| Rostral Amygdalopiriform Area                     | -0.00207               | 0.666              | 0.808              | 2.07e-05                      | 0.828                     | 0.911                     | -0.00325                   | 0.628                  | 0.788                  |
| Primary Somatosensory Cortex                      | 0.00496                | 0.874              | 0.942              | 0.000821                      | 0.153                     | 0.334                     | -0.0831                    | 0.0571                 | 0.175                  |
| Primary Somatosensory Cortex: Barrel Field        | 0.0374                 | 0.561              | 0.732              | 0.00106                       | 0.364                     | 0.563                     | -0.271                     | 0.00267                | 0.0144                 |
| Primary Somatosensory Cortex: Dysgranular Zone    | -8.37e-05              | 0.973              | 0.99               | 8.51e-05                      | 0.0639                    | 0.188                     | -0.00789                   | 0.0248                 | 0.0932                 |
| Primary Somatosensory Cortex: Forelimb Region     | 0.00755                | 0.813              | 0.903              | 0.000661                      | 0.266                     | 0.47                      | -0.119                     | 0.00801                | 0.0371                 |
| Primary Somatosensory Cortex: Hindlimb Region     | 0.0147                 | 0.504              | 0.687              | 0.000171                      | 0.679                     | 0.818                     | -0.0824                    | 0.00751                | 0.035                  |
| Primary Somatosensory Cortex: Jaw Region          | -0.00227               | 0.676              | 0.815              | 0.000192                      | 0.0611                    | 0.182                     | -0.0116                    | 0.128                  | 0.297                  |
| Primary Somatosensory Cortex: Shoulder Region     | 0.00115                | 0.567              | 0.737              | 2.94e-05                      | 0.433                     | 0.625                     | -0.0069                    | 0.0146                 | 0.0618                 |
| Primary Somatosensory Cortex: Trunk Region        | 0.00449                | 0.305              | 0.508              | 4.84e-05                      | 0.559                     | 0.731                     | -0.0169                    | 0.00589                | 0.0284                 |
| Primary Somatosensory Cortex: Upper Lip Region    | 0.00613                | 0.865              | 0.936              | 0.000518                      | 0.426                     | 0.619                     | -0.125                     | 0.0132                 | 0.0564                 |
| Secondary Somatosensory Cortex                    | 0.0119                 | 0.772              | 0.88               | 0.000365                      | 0.616                     | 0.777                     | -0.13                      | 0.023                  | 0.0878                 |
| Temporal Association Area                         | -0.00148               | 0.945              | 0.977              | -0.000105                     | 0.791                     | 0.891                     | -0.044                     | 0.145                  | 0.324                  |
| Primary Visual Cortex                             | 0.016                  | 0.468              | 0.655              | -0.000128                     | 0.753                     | 0.867                     | -0.0895                    | 0.00379                | 0.0194                 |
| Primary Visual Cortex: Binocular Area             | 0.00613                | 0.706              | 0.837              | 0.000239                      | 0.425                     | 0.618                     | -0.0556                    | 0.0147                 | 0.0623                 |
| Primary Visual Cortex: Monocular Area             | 0.00909                | 0.604              | 0.768              | 0.000169                      | 0.603                     | 0.768                     | -0.056                     | 0.0228                 | 0.0875                 |
| Secondary Visual Cortex: Lateral Area             | 0.0119                 | 0.583              | 0.751              | 0.000184                      | 0.643                     | 0.795                     | -0.0819                    | 0.00682                | 0.0323                 |
| Secondary Visual Cortex: Mediolateral Area        | 0.00575                | 0.532              | 0.712              | 8.33e-05                      | 0.632                     | 0.79                      | -0.0291                    | 0.0239                 | 0.0907                 |
| Secondary Visual Cortex: Mediomedial Area         | 0.0154                 | 0.441              | 0.632              | -0.000216                     | 0.567                     | 0.738                     | -0.0644                    | 0.0219                 | 0.0849                 |
| Clastrum: Ventral Part                            | 0.00278                | 0.557              | 0.73               | 0.000187                      | 0.0242                    | 0.0915                    | -0.0122                    | 0.0665                 | 0.193                  |
| Ventral Nucleus Of The Endopiriform Clastrum      | -0.000336              | 0.921              | 0.966              | 0.000127                      | 0.0391                    | 0.133                     | -0.0028                    | 0.554                  | 0.727                  |
| Ventral Intermediate Entorhinal Cortex            | -0.0129                | 0.187              | 0.379              | 9.61e-05                      | 0.608                     | 0.772                     | -0.00326                   | 0.811                  | 0.902                  |
| Ventral Orbital Cortex                            | 0.0053                 | 0.687              | 0.824              | 0.000251                      | 0.316                     | 0.517                     | -0.028                     | 0.129                  | 0.297                  |
| Ventral Tenia Tecta                               | 0.00022                | 0.82               | 0.907              | 2.97e-05                      | 0.112                     | 0.271                     | -0.00228                   | 0.0922                 | 0.238                  |

**Supplementary Table S.2** Table of 159 segmented atlas structures affected by metformin treatment (MET16). Columns of the table contain information for the coefficient estimates for metformin treatment, interactions with age or radiation and corresponding test statistics: p value (p) and FDR adjusted p values (q).

| Structure                                       | $\beta_{MET19}$ | $\rho_{MET19}$ | $q_{MET19}$ | $\beta_{MET19:Growth}$ | $\rho_{MET19:Growth}$ | $q_{MET19:Growth}$ | $\beta_{MET19:70y}$ | $\rho_{MET19:70y}$ | $q_{MET19:70y}$ |
|-------------------------------------------------|-----------------|----------------|-------------|------------------------|-----------------------|--------------------|---------------------|--------------------|-----------------|
| Amigdala                                        | -0.0079         | 0.905          | 0.956       | -6.19e-05              | 0.96                  | 0.982              | -0.0188             | 0.836              | 0.918           |
| Anterior Commissure: Pars Anterior              | -0.0075         | 0.445          | 0.634       | 6.29e-05               | 0.739                 | 0.858              | 0.00752             | 0.575              | 0.744           |
| Anterior Commissure: Pars Posterior             | -1.84e-05       | 0.995          | 0.997       | 6.03e-05               | 0.328                 | 0.53               | 0.00252             | 0.557              | 0.73            |
| Basal Forebrain                                 | 0.0507          | 0.164          | 0.349       | -0.000193              | 0.778                 | 0.883              | -0.0445             | 0.371              | 0.57            |
| Bed Nucleus Of Stria Terminalis                 | 0.000963        | 0.925          | 0.967       | 0.000197               | 0.313                 | 0.514              | 0.0194              | 0.166              | 0.352           |
| Cerebellar Peduncle: Inferior                   | -0.013          | 0.096          | 0.245       | 0.000135               | 0.397                 | 0.593              | 0.00463             | 0.663              | 0.807           |
| Cerebellar Peduncle: Middle                     | -0.00934        | 0.466          | 0.653       | 0.00023                | 0.363                 | 0.563              | 0.0236              | 0.178              | 0.367           |
| Cerebellar Peduncle: Superior                   | -0.000178       | 0.983          | 0.993       | 0.000358               | 0.0295                | 0.107              | 0.0189              | 0.0986             | 0.249           |
| Cerebral Aqueduct                               | -0.00855        | 0.224          | 0.422       | 0.000254               | 0.0816                | 0.221              | 0.0175              | 0.0677             | 0.195           |
| Cerebral Peduncle                               | -0.0155         | 0.341          | 0.542       | 0.000434               | 0.154                 | 0.337              | 0.0433              | 0.0516             | 0.163           |
| Colliculus: Inferior                            | -0.0606         | 0.133          | 0.304       | 0.000343               | 0.675                 | 0.814              | 0.0843              | 0.126              | 0.293           |
| Colliculus: Superior                            | 0.0394          | 0.69           | 0.827       | -0.000285              | 0.886                 | 0.947              | 0.0197              | 0.884              | 0.946           |
| Corpus Callosum                                 | -0.0673         | 0.42           | 0.615       | 0.00265                | 0.0857                | 0.229              | 0.0941              | 0.41               | 0.605           |
| Corticospinal Tract/Pyramids                    | -0.0168         | 0.157          | 0.341       | 0.000166               | 0.474                 | 0.662              | 0.0169              | 0.296              | 0.501           |
| Cuneate Nucleus                                 | -0.00318        | 0.149          | 0.329       | 7.23e-05               | 0.122                 | 0.286              | -0.00285            | 0.343              | 0.545           |
| Dentate Gyrus Of Hippocampus                    | 0.000317        | 0.989          | 0.995       | 4.4e-06                | 0.992                 | 0.995              | 0.0279              | 0.392              | 0.59            |
| Facial Nerve (Cranial Nerve 7)                  | -0.00428        | 0.0496         | 0.159       | 2.9e-05                | 0.521                 | 0.702              | 0.00332             | 0.265              | 0.469           |
| Fasciculus Retroflexus                          | 0.0012          | 0.532          | 0.712       | 3.46e-06               | 0.925                 | 0.967              | 0.000801            | 0.759              | 0.871           |
| Fimbria                                         | 0.00243         | 0.932          | 0.971       | 0.000803               | 0.144                 | 0.322              | 0.0407              | 0.297              | 0.502           |
| Fornix                                          | 0.00252         | 0.558          | 0.73        | 5e-05                  | 0.538                 | 0.715              | 0.00969             | 0.0993             | 0.25            |
| Fourth Ventricle                                | -0.0174         | 0.0971         | 0.247       | 0.000381               | 0.0883                | 0.232              | 0.00784             | 0.584              | 0.752           |
| Fundus Of Striatum                              | 0.00116         | 0.243          | 0.448       | -1.17e-05              | 0.549                 | 0.724              | -0.00153            | 0.262              | 0.467           |
| Globus Pallidus                                 | -0.0389         | 0.0752         | 0.209       | 0.00025                | 0.534                 | 0.713              | 0.0883              | 0.00323            | 0.017           |
| Habenular Commissure                            | 0.000292        | 0.763          | 0.874       | 4.48e-05               | 0.0169                | 0.0692             | 7.72e-05            | 0.954              | 0.98            |
| Hippocampus                                     | -0.113          | 0.348          | 0.55        | 0.00151                | 0.492                 | 0.677              | 0.162               | 0.325              | 0.527           |
| Hypothalamus                                    | 0.0357          | 0.597          | 0.763       | 0.00051                | 0.68                  | 0.818              | 0.123               | 0.181              | 0.371           |
| Inferior Olivary Complex                        | -0.00332        | 0.0333         | 0.117       | 3.31e-05               | 0.296                 | 0.501              | 0.00164             | 0.441              | 0.632           |
| Internal Capsule                                | -0.0257         | 0.262          | 0.467       | 0.000544               | 0.202                 | 0.398              | 0.0996              | 0.00152            | 0.00886         |
| Interpeduncular Nucleus                         | 0.000615        | 0.818          | 0.906       | -2.48e-05              | 0.639                 | 0.792              | -0.000917           | 0.802              | 0.897           |
| Lateral Olfactory Tract                         | 0.00054         | 0.918          | 0.964       | -4.66e-05              | 0.638                 | 0.792              | 0.00073             | 0.918              | 0.965           |
| Lateral Septum                                  | -0.013          | 0.527          | 0.708       | 0.000175               | 0.641                 | 0.794              | 0.022               | 0.434              | 0.626           |
| Lateral Ventricle                               | -0.0271         | 0.521          | 0.702       | 0.000851               | 0.305                 | 0.508              | 0.0293              | 0.611              | 0.773           |
| Mammillary Bodies                               | -0.00235        | 0.568          | 0.739       | -2.13e-05              | 0.791                 | 0.891              | 0.00997             | 0.0773             | 0.213           |
| Mammillothalamic Tract                          | 0.00191         | 0.292          | 0.498       | -2.31e-05              | 0.498                 | 0.683              | 0.0011              | 0.656              | 0.803           |
| Medial Lemniscus/Medial Longitudinal Fasciculus | -0.0203         | 0.34           | 0.541       | 0.00013                | 0.748                 | 0.863              | 0.0314              | 0.279              | 0.485           |
| Medial Septum                                   | 0.00488         | 0.541          | 0.717       | 3.68e-05               | 0.804                 | 0.898              | 9.78e-05            | 0.993              | 0.995           |
| Medulla                                         | -0.47           | 0.0377         | 0.129       | 0.000484               | 0.915                 | 0.963              | 0.108               | 0.726              | 0.849           |
| Midbrain                                        | 0.0346          | 0.709          | 0.839       | 0.00167                | 0.331                 | 0.532              | 0.112               | 0.379              | 0.578           |
| Nucleus Accumbens                               | 0.0047          | 0.882          | 0.946       | -0.000535              | 0.379                 | 0.578              | -0.0529             | 0.22               | 0.419           |
| Olfactory Bulbs                                 | 0.0837          | 0.638          | 0.792       | -0.00429               | 0.218                 | 0.417              | -0.313              | 0.199              | 0.395           |
| Olfactory Tubercle                              | 0.0405          | 0.158          | 0.342       | -0.000705              | 0.22                  | 0.418              | -0.0789             | 0.0441             | 0.146           |
| Optic Tract                                     | -0.00159        | 0.882          | 0.946       | 0.000227               | 0.25                  | 0.455              | 0.0249              | 0.0875             | 0.231           |
| Periaqueductal Grey                             | 0.00949         | 0.791          | 0.891       | 0.000432               | 0.542                 | 0.717              | 0.0415              | 0.395              | 0.591           |
| Pons                                            | -0.234          | 0.115          | 0.277       | 0.00358                | 0.223                 | 0.421              | 0.315               | 0.12               | 0.285           |
| Pontine Nucleus                                 | -0.00604        | 0.416          | 0.61        | -1.19e-05              | 0.936                 | 0.972              | 0.0165              | 0.103              | 0.257           |
| Posterior Commissure                            | 0.00212         | 0.184          | 0.375       | -7.77e-07              | 0.98                  | 0.993              | -0.00122            | 0.577              | 0.746           |
| Pre-Para Subiculum                              | 0.00151         | 0.941          | 0.975       | 0.000141               | 0.719                 | 0.845              | -0.0218             | 0.431              | 0.623           |
| Stratum Granulosum Of Hippocampus               | 0.00122         | 0.849          | 0.926       | -4.82e-05              | 0.697                 | 0.829              | 0.009               | 0.304              | 0.508           |
| Stria Medullaris                                | 0.00884         | 0.212          | 0.409       | 0.000117               | 0.393                 | 0.59               | 0.00118             | 0.903              | 0.955           |
| Stria Terminalis                                | -0.00286        | 0.688          | 0.825       | 0.000135               | 0.303                 | 0.507              | 0.0256              | 0.00864            | 0.0397          |
| Striatum                                        | -0.222          | 0.129          | 0.297       | 0.00287                | 0.288                 | 0.496              | 0.168               | 0.401              | 0.597           |
| Subependymale Zone / Rhinocoele                 | 0.00012         | 0.843          | 0.922       | -8.4e-06               | 0.492                 | 0.677              | -0.00107            | 0.194              | 0.389           |
| Superior Olivary Complex                        | -0.0163         | 0.00638        | 0.0305      | 0.000166               | 0.177                 | 0.367              | 0.00918             | 0.259              | 0.466           |

| Structure                                         | $\beta_{MET19}$ | $P_{MET19}$ | $Q_{MET19}$ | $\beta_{MET19-Growth}$ | $P_{MET19-Growth}$ | $Q_{MET19-Growth}$ | $\beta_{MET197Gy}$ | $P_{MET197Gy}$ | $Q_{MET197Gy}$ |
|---------------------------------------------------|-----------------|-------------|-------------|------------------------|--------------------|--------------------|--------------------|----------------|----------------|
| Thalamus                                          | 0.0316          | 0.813       | 0.903       | 0.00117                | 0.642              | 0.794              | 0.136              | 0.455          | 0.644          |
| Third Ventricle                                   | 0.0197          | 0.124       | 0.289       | 0.000398               | 0.126              | 0.293              | -0.0044            | 0.801          | 0.896          |
| Ventral Tegmental Decussation                     | 0.000401        | 0.79        | 0.89        | 3.91e-05               | 0.185              | 0.377              | 0.00165            | 0.422          | 0.616          |
| Lobules 1-2: Lingula And Central Lobule (Ventral) | -0.0494         | 0.0329      | 0.116       | 0.00153                | 0.000894           | 0.00533            | 0.0444             | 0.159          | 0.343          |
| Lobule 3: Central Lobule (Dorsal)                 | -0.0472         | 0.0504      | 0.161       | 0.00103                | 0.0474             | 0.154              | 0.0603             | 0.0671         | 0.194          |
| Lobules 4-5: Culmen (Ventral And Dorsal)          | -0.0673         | 0.114       | 0.276       | 0.00111                | 0.208              | 0.405              | 0.0204             | 0.726          | 0.849          |
| Lobule 6: Declive                                 | -0.0506         | 0.0694      | 0.198       | 0.000631               | 0.284              | 0.49               | -0.00913           | 0.81           | 0.902          |
| Lobule 7: Tuber (Or Folium)                       | -0.0151         | 0.167       | 0.353       | 8.64e-05               | 0.71               | 0.84               | -0.00249           | 0.867          | 0.938          |
| Lobule 8: Pyramis                                 | -0.0155         | 0.434       | 0.626       | 0.00107                | 0.0103             | 0.046              | 0.0126             | 0.64           | 0.793          |
| Lobule 9: Uvula                                   | -0.0283         | 0.332       | 0.533       | 0.00138                | 0.0273             | 0.101              | 0.00911            | 0.819          | 0.906          |
| Lobule 10: Nodulus                                | -0.0365         | 0.0463      | 0.151       | 0.000354               | 0.366              | 0.565              | -0.0134            | 0.592          | 0.759          |
| Anterior Lobule (Lobules 4-5)                     | -0.0194         | 0.162       | 0.347       | 0.000388               | 0.179              | 0.369              | 0.0251             | 0.184          | 0.375          |
| Simple Lobule (Lobule 6)                          | -0.0352         | 0.306       | 0.508       | 0.00055                | 0.44               | 0.631              | 0.0158             | 0.737          | 0.858          |
| Crus 1: Ansiform Lobule (Lobule 6)                | -0.0396         | 0.276       | 0.482       | 0.000159               | 0.831              | 0.914              | 0.0179             | 0.719          | 0.845          |
| Crus 2: Ansiform Lobule (Lobule 7)                | -0.0743         | 0.0237      | 0.0903      | 0.000582               | 0.397              | 0.593              | 0.027              | 0.546          | 0.721          |
| Paramedian Lobule (Lobule 7)                      | -0.0957         | 0.0403      | 0.136       | 0.00277                | 0.00425            | 0.0216             | 0.0873             | 0.17           | 0.356          |
| Copula: Pyramis (Lobule 8)                        | -0.0482         | 0.0527      | 0.165       | 0.00153                | 0.00331            | 0.0172             | 0.042              | 0.216          | 0.414          |
| Flocculus (Fl)                                    | -0.009          | 0.343       | 0.545       | 0.000169               | 0.362              | 0.562              | 0.000597           | 0.963          | 0.984          |
| Paraflocculus (Pfl)                               | 0.0439          | 0.379       | 0.578       | 0.000171               | 0.86               | 0.933              | -0.132             | 0.0531         | 0.166          |
| Trunk Of Arbor Vita                               | -0.0695         | 0.103       | 0.257       | 0.00156                | 0.0821             | 0.221              | 0.052              | 0.372          | 0.57           |
| Lobule 1-2 White Matter                           | -0.00318        | 0.0578      | 0.176       | 0.000106               | 0.00121            | 0.00702            | 0.00171            | 0.454          | 0.643          |
| Lobule 3 White Matter                             | -0.00593        | 0.0797      | 0.217       | 0.000176               | 0.0171             | 0.0699             | 0.00842            | 0.0683         | 0.196          |
| Trunk Of Lobules 1-3 White Matter                 | -0.00243        | 0.292       | 0.497       | 0.000147               | 0.00256            | 0.0139             | 0.00261            | 0.407          | 0.603          |
| Lobules 4-5 White Matter                          | -0.00932        | 0.278       | 0.484       | 0.000299               | 0.114              | 0.275              | 0.0131             | 0.264          | 0.469          |
| Lobules 6-7 White Matter                          | -0.0193         | 0.0241      | 0.0914      | 0.000303               | 0.0978             | 0.248              | 0.00735            | 0.529          | 0.71           |
| Lobule 8 White Matter                             | -0.00111        | 0.43        | 0.622       | 5.08e-05               | 0.0881             | 0.232              | 0.000685           | 0.721          | 0.847          |
| Trunk Of Lobules 6-8 White Matter                 | -0.00253        | 0.0567      | 0.174       | 5.47e-05               | 0.0622             | 0.184              | 0.00243            | 0.179          | 0.369          |
| Lobule 9 White Matter                             | -0.0024         | 0.429       | 0.621       | 8.22e-05               | 0.207              | 0.403              | 0.0011             | 0.79           | 0.89           |
| Lobule 10 White Matter                            | -0.00288        | 0.0477      | 0.154       | 8.97e-06               | 0.774              | 0.882              | -0.00141           | 0.476          | 0.664          |
| Anterior Lobule White Matter                      | -0.000488       | 0.675       | 0.814       | 2.4e-05                | 0.325              | 0.527              | 0.00123            | 0.44           | 0.631          |
| Simple Lobule White Matter                        | -0.0033         | 0.421       | 0.616       | 8.51e-05               | 0.32               | 0.523              | 0.00344            | 0.539          | 0.716          |
| Crus 1 White Matter                               | -0.00371        | 0.426       | 0.618       | 6.21e-05               | 0.518              | 0.701              | 0.00396            | 0.533          | 0.712          |
| Trunk Of Simple And Crus 1 White Matter           | -0.00302        | 0.144       | 0.321       | 9.97e-05               | 0.0227             | 0.0871             | 0.0042             | 0.137          | 0.31           |
| Crus 2 White Matter                               | -0.00691        | 0.0321      | 0.114       | 0.000118               | 0.0839             | 0.225              | 0.00377            | 0.391          | 0.588          |
| Paramedian Lobule                                 | -0.00356        | 0.0551      | 0.171       | 9.13e-05               | 0.0176             | 0.0712             | 0.00331            | 0.19           | 0.384          |
| Trunk Of Crus 2 And Paramedian White Matter       | -0.00742        | 0.0548      | 0.17        | 0.000152               | 0.0619             | 0.184              | 0.00621            | 0.238          | 0.442          |
| Copula White Matter                               | -0.00172        | 0.104       | 0.258       | 6.28e-05               | 0.00502            | 0.0247             | 0.000756           | 0.6            | 0.765          |
| Paraflocculus White Matter                        | 0.00135         | 0.732       | 0.854       | -1.04e-05              | 0.894              | 0.952              | -0.00673           | 0.212          | 0.409          |
| Flocculus White Matter                            | -0.000964       | 0.184       | 0.375       | 2.38e-05               | 0.0913             | 0.237              | 0.000484           | 0.625          | 0.785          |
| Dentate Nucleus                                   | -0.00592        | 0.0981      | 0.248       | 8.95e-05               | 0.246              | 0.451              | 0.00409            | 0.402          | 0.598          |
| Nucleus Interpositus                              | -0.0108         | 0.0639      | 0.188       | 0.000155               | 0.221              | 0.419              | 0.00512            | 0.519          | 0.702          |
| Fastigial Nucleus                                 | -0.0098         | 0.0662      | 0.193       | 0.000192               | 0.0893             | 0.234              | 0.00372            | 0.609          | 0.772          |
| Cingulate Cortex: Area 24A                        | -0.00944        | 0.557       | 0.73        | 9.69e-05               | 0.746              | 0.861              | -0.014             | 0.524          | 0.706          |
| Cingulate Cortex: Area 24A'                       | 0.00474         | 0.458       | 0.646       | 0.000169               | 0.174              | 0.363              | -0.0198            | 0.0233         | 0.0889         |
| Cingulate Cortex: Area 24B                        | -0.00474        | 0.717       | 0.844       | -8.66e-05              | 0.73               | 0.853              | -0.0156            | 0.382          | 0.58           |
| Cingulate Cortex: Area 24B'                       | -0.00249        | 0.651       | 0.8         | -6.87e-05              | 0.529              | 0.71               | -0.00187           | 0.804          | 0.898          |
| Cingulate Cortex: Area 25                         | 0.00493         | 0.233       | 0.436       | 1.81e-05               | 0.814              | 0.903              | -0.00711           | 0.209          | 0.406          |
| Cingulate Cortex: Area 29A                        | 0.000171        | 0.987       | 0.994       | -1.89e-05              | 0.928              | 0.969              | -0.0116            | 0.407          | 0.603          |
| Cingulate Cortex: Area 29B                        | 0.00163         | 0.722       | 0.847       | -2.81e-05              | 0.757              | 0.869              | -0.00586           | 0.35           | 0.552          |
| Cingulate Cortex: Area 29C                        | 0.0165          | 0.263       | 0.468       | -0.000409              | 0.167              | 0.353              | -0.0439            | 0.0293         | 0.107          |
| Cingulate Cortex: Area 30                         | 0.0082          | 0.74        | 0.858       | -0.000624              | 0.199              | 0.395              | -0.0328            | 0.33           | 0.532          |
| Cingulate Cortex: Area 32                         | 0.0111          | 0.645       | 0.796       | -0.000391              | 0.403              | 0.599              | -0.0378            | 0.25           | 0.455          |
| Amygdalopiriform Transition Area                  | -0.0141         | 0.0457      | 0.149       | 0.000239               | 0.0978             | 0.248              | 0.00932            | 0.332          | 0.533          |

| Structure                                         | $\beta_{\text{MET19}}$ | $p_{\text{MET19}}$ | $q_{\text{MET19}}$ | $\beta_{\text{MET19:Growth}}$ | $p_{\text{MET19:Growth}}$ | $q_{\text{MET19:Growth}}$ | $\beta_{\text{MET19:7Gy}}$ | $p_{\text{MET19:7Gy}}$ | $q_{\text{MET19:7Gy}}$ |
|---------------------------------------------------|------------------------|--------------------|--------------------|-------------------------------|---------------------------|---------------------------|----------------------------|------------------------|------------------------|
| Primary Auditory Cortex                           | -0.0163                | 0.146              | 0.325              | 0.000327                      | 0.136                     | 0.309                     | 0.00665                    | 0.663                  | 0.807                  |
| Secondary Auditory Cortex: Dorsal Area            | -0.0057                | 0.639              | 0.792              | 0.000253                      | 0.28                      | 0.486                     | -0.0115                    | 0.489                  | 0.675                  |
| Secondary Auditory Cortex: Ventral Area           | -0.0176                | 0.248              | 0.454              | 0.000317                      | 0.294                     | 0.5                       | 0.00887                    | 0.67                   | 0.811                  |
| Caudomedial Entorhinal Cortex                     | 0.024                  | 0.645              | 0.796              | -0.000145                     | 0.886                     | 0.947                     | -0.0317                    | 0.657                  | 0.803                  |
| Cingulum                                          | -0.000764              | 0.903              | 0.965              | 0.000148                      | 0.213                     | 0.411                     | -0.00483                   | 0.573                  | 0.743                  |
| Clastrum                                          | 0.000295               | 0.936              | 0.972              | 1.09e-05                      | 0.884                     | 0.946                     | -0.00658                   | 0.189                  | 0.381                  |
| Cortex-Amygdala Transition Zones                  | 0.018                  | 0.0235             | 0.0896             | -0.000198                     | 0.211                     | 0.409                     | -0.0258                    | 0.0172                 | 0.0703                 |
| Clastrum: Dorsal Part                             | -0.0014                | 0.508              | 0.691              | 2.48e-05                      | 0.529                     | 0.71                      | 0.00274                    | 0.344                  | 0.546                  |
| Dorsal Nucleus Of The Endopiriform                | -0.00287               | 0.745              | 0.861              | 4.34e-05                      | 0.791                     | 0.891                     | -0.000533                  | 0.965                  | 0.985                  |
| Dorsal Intermediate Entorhinal Cortex             | -0.0307                | 0.0424             | 0.141              | 0.000239                      | 0.424                     | 0.618                     | 0.019                      | 0.357                  | 0.558                  |
| Dorsolateral Entorhinal Cortex                    | -0.0357                | 0.0647             | 0.189              | -0.000141                     | 0.706                     | 0.837                     | 0.0163                     | 0.538                  | 0.715                  |
| Dorsolateral Orbital Cortex                       | 0.00631                | 0.542              | 0.717              | -0.000144                     | 0.513                     | 0.695                     | -0.0176                    | 0.213                  | 0.411                  |
| Dorsal Tenia Tecta                                | 0.00921                | 0.106              | 0.261              | -0.000142                     | 0.182                     | 0.373                     | -0.0166                    | 0.0335                 | 0.118                  |
| Ectorhinal Cortex                                 | -0.00789               | 0.675              | 0.814              | -7.84e-06                     | 0.983                     | 0.993                     | 0.00327                    | 0.899                  | 0.954                  |
| Frontal Cortex: Area 3                            | -9.75e-05              | 0.987              | 0.995              | 7.35e-06                      | 0.951                     | 0.979                     | -0.00723                   | 0.38                   | 0.578                  |
| Frontal Association Cortex                        | -0.00598               | 0.941              | 0.975              | -0.000493                     | 0.768                     | 0.877                     | -0.0982                    | 0.372                  | 0.571                  |
| Intermediate Nucleus Of The Endopiriform Clastrum | 0.0038                 | 0.368              | 0.567              | -7.93e-05                     | 0.358                     | 0.56                      | -0.00847                   | 0.142                  | 0.319                  |
| Insular Region: Not Subdivided                    | 0.0427                 | 0.436              | 0.628              | -3.39e-05                     | 0.974                     | 0.99                      | -0.0372                    | 0.619                  | 0.779                  |
| Lateral Orbital Cortex                            | -0.0026                | 0.949              | 0.979              | -4.41e-05                     | 0.959                     | 0.982                     | -0.0624                    | 0.265                  | 0.469                  |
| Lateral Parietal Association Cortex               | 0.00141                | 0.461              | 0.649              | -4.8e-05                      | 0.209                     | 0.406                     | -0.00127                   | 0.627                  | 0.786                  |
| Primary Motor Cortex                              | -0.0224                | 0.693              | 0.828              | 0.000585                      | 0.593                     | 0.76                      | -0.0574                    | 0.459                  | 0.647                  |
| Secondary Motor Cortex                            | 0.0025                 | 0.961              | 0.982              | -0.000603                     | 0.533                     | 0.712                     | -0.0971                    | 0.16                   | 0.344                  |
| Medial Entorhinal Cortex                          | -0.00327               | 0.696              | 0.829              | 0.00013                       | 0.43                      | 0.622                     | 0.00448                    | 0.694                  | 0.829                  |
| Medial Orbital Cortex                             | 0.00946                | 0.636              | 0.79               | -4.3e-05                      | 0.915                     | 0.963                     | -0.0288                    | 0.291                  | 0.497                  |
| Medial Parietal Association Cortex                | 0.00462                | 0.216              | 0.414              | -0.000111                     | 0.144                     | 0.322                     | -0.00594                   | 0.244                  | 0.45                   |
| Piriform Cortex                                   | 0.0703                 | 0.303              | 0.507              | -0.00111                      | 0.394                     | 0.59                      | -0.0998                    | 0.284                  | 0.491                  |
| Posterolateral Cortical Amygdaloid Area           | 0.00306                | 0.778              | 0.883              | -4.31e-05                     | 0.842                     | 0.922                     | -0.0152                    | 0.305                  | 0.508                  |
| Posteromedial Cortical Amygdaloid Area            | -0.0153                | 0.162              | 0.346              | 7.85e-05                      | 0.709                     | 0.839                     | 0.0142                     | 0.34                   | 0.541                  |
| Perirhinal Cortex                                 | -0.0113                | 0.53               | 0.711              | -0.000155                     | 0.651                     | 0.8                       | 0.00876                    | 0.721                  | 0.847                  |
| Parietal Cortex: Posterior Area: Rostral Part     | 0.000557               | 0.499              | 0.683              | -7.96e-06                     | 0.626                     | 0.786                     | -0.00116                   | 0.305                  | 0.508                  |
| Rostral Amygdalopiriform Area                     | -0.00205               | 0.679              | 0.818              | 1.1e-05                       | 0.915                     | 0.963                     | -0.00415                   | 0.54                   | 0.717                  |
| Primary Somatosensory Cortex                      | -0.00601               | 0.852              | 0.928              | 0.000269                      | 0.664                     | 0.808                     | -0.0314                    | 0.477                  | 0.664                  |
| Primary Somatosensory Cortex: Barrel Field        | -0.00245               | 0.971              | 0.989              | 0.000288                      | 0.82                      | 0.907                     | -0.053                     | 0.56                   | 0.732                  |
| Primary Somatosensory Cortex: Dysgranular Zone    | -0.000311              | 0.905              | 0.966              | 2.43e-05                      | 0.625                     | 0.785                     | -0.00235                   | 0.507                  | 0.69                   |
| Primary Somatosensory Cortex: Forelimb Region     | -0.0168                | 0.612              | 0.774              | 0.000401                      | 0.532                     | 0.712                     | -0.0226                    | 0.616                  | 0.777                  |
| Primary Somatosensory Cortex: Hindlimb Region     | -0.00138               | 0.952              | 0.979              | -1.33e-06                     | 0.998                     | 0.998                     | -0.0217                    | 0.485                  | 0.672                  |
| Primary Somatosensory Cortex: Jaw Region          | -0.00538               | 0.339              | 0.541              | 6.81e-05                      | 0.538                     | 0.715                     | 0.0013                     | 0.865                  | 0.936                  |
| Primary Somatosensory Cortex: Shoulder Region     | 0.000209               | 0.92               | 0.966              | -7.88e-06                     | 0.846                     | 0.924                     | -0.0023                    | 0.419                  | 0.613                  |
| Primary Somatosensory Cortex: Trunk Region        | 0.00358                | 0.429              | 0.622              | -7.74e-05                     | 0.387                     | 0.586                     | -0.00605                   | 0.328                  | 0.53                   |
| Primary Somatosensory Cortex: Upper Lip Region    | -0.0055                | 0.882              | 0.946              | -4.15e-05                     | 0.953                     | 0.979                     | -0.00749                   | 0.883                  | 0.946                  |
| Secondary Somatosensory Cortex                    | 0.00276                | 0.948              | 0.979              | 9.23e-06                      | 0.991                     | 0.995                     | 0.000659                   | 0.991                  | 0.995                  |
| Temporal Association Area                         | -0.0169                | 0.45               | 0.638              | 0.000292                      | 0.499                     | 0.683                     | -0.00383                   | 0.9                    | 0.955                  |
| Primary Visual Cortex                             | 0.0194                 | 0.394              | 0.59               | -0.000332                     | 0.451                     | 0.64                      | -0.0283                    | 0.363                  | 0.563                  |
| Primary Visual Cortex: Binocular Area             | 0.00219                | 0.897              | 0.953              | 0.000282                      | 0.384                     | 0.582                     | -0.0188                    | 0.415                  | 0.609                  |
| Primary Visual Cortex: Monocular Area             | -8.84e-05              | 0.996              | 0.998              | 4.79e-05                      | 0.892                     | 0.95                      | -0.00844                   | 0.734                  | 0.855                  |
| Secondary Visual Cortex: Lateral Area             | -0.00581               | 0.795              | 0.892              | 0.000489                      | 0.254                     | 0.459                     | -0.0278                    | 0.363                  | 0.562                  |
| Secondary Visual Cortex: Mediolateral Area        | 0.000176               | 0.985              | 0.994              | -8.42e-05                     | 0.654                     | 0.802                     | -0.00221                   | 0.865                  | 0.936                  |
| Secondary Visual Cortex: Mediomedial Area         | 0.00571                | 0.783              | 0.886              | -0.000179                     | 0.66                      | 0.805                     | -0.00872                   | 0.758                  | 0.87                   |
| Clastrum: Ventral Part                            | -0.00391               | 0.425              | 0.618              | 5e-05                         | 0.577                     | 0.746                     | 0.0103                     | 0.123                  | 0.289                  |
| Ventral Nucleus Of The Endopiriform Clastrum      | -0.00172               | 0.623              | 0.783              | 1.87e-07                      | 0.998                     | 0.998                     | 0.0017                     | 0.722                  | 0.847                  |
| Ventral Intermediate Entorhinal Cortex            | -0.0134                | 0.185              | 0.377              | 0.000168                      | 0.408                     | 0.603                     | 0.0128                     | 0.353                  | 0.554                  |
| Ventral Orbital Cortex                            | 0.00651                | 0.633              | 0.79               | -4.13e-05                     | 0.878                     | 0.944                     | -0.0262                    | 0.16                   | 0.344                  |
| Ventral Tenia Tecta                               | 0.00075                | 0.455              | 0.644              | -1.89e-05                     | 0.349                     | 0.551                     | -0.00236                   | 0.0858                 | 0.229                  |

**Supplementary Table S.3** Table of 159 segmented atlas structures affected by metformin treatment (MET19). Columns of the table contain information for the coefficient estimates for metformin treatment, interactions with age or radiation and corresponding test statistics: p value (p) and FDR adjusted p values (q).

| Structure                                       | $\beta_{SEX:7Qy:MET16}$ | $P_{SEX:7Qy:MET16}$ | $Q_{SEX:7Qy:MET16}$ | $\beta_{SEX:7Qy:MET16:Growth}$ | $P_{SEX:7Qy:MET16:Growth}$ | $Q_{SEX:7Qy:MET16:Growth}$ |
|-------------------------------------------------|-------------------------|---------------------|---------------------|--------------------------------|----------------------------|----------------------------|
| A mygdala                                       | 0.232                   | 0.159               | 0.343               | -0.00497                       | 0.111                      | 0.27                       |
| Anterior Commissure: Pars Anterior              | 0.0243                  | 0.317               | 0.519               | 0.000308                       | 0.514                      | 0.698                      |
| Anterior Commissure: Pars Posterior             | 0.00788                 | 0.311               | 0.512               | 3.42e-05                       | 0.825                      | 0.91                       |
| Basal Forebrain                                 | 0.175                   | 0.0527              | 0.165               | -0.00171                       | 0.321                      | 0.524                      |
| Bed Nucleus Of Stria Terminalis                 | 0.0827                  | 0.00118             | 0.00689             | -0.000638                      | 0.194                      | 0.389                      |
| Cerebellar Peduncle: Inferior                   | 0.0398                  | 0.0397              | 0.135               | -0.000949                      | 0.0173                     | 0.0706                     |
| Cerebellar Peduncle: Middle                     | 0.0711                  | 0.0255              | 0.0952              | -0.000963                      | 0.129                      | 0.297                      |
| Cerebellar Peduncle: Superior                   | 0.0466                  | 0.0249              | 0.0936              | -0.000864                      | 0.0363                     | 0.126                      |
| Cerebral Aqueduct                               | 0.0213                  | 0.224               | 0.422               | -0.000253                      | 0.486                      | 0.673                      |
| Cerebral Peduncle                               | 0.0697                  | 0.0839              | 0.225               | -0.00076                       | 0.32                       | 0.523                      |
| Colliculus: Inferior                            | 0.169                   | 0.091               | 0.236               | -0.00233                       | 0.256                      | 0.461                      |
| Colliculus: Superior                            | 0.635                   | 0.00979             | 0.0441              | -0.00509                       | 0.308                      | 0.51                       |
| Corpus Callosum                                 | 0.579                   | 0.00522             | 0.0255              | -0.0045                        | 0.246                      | 0.451                      |
| Corticospinal Tract/Pyramids                    | 0.0812                  | 0.0058              | 0.0281              | -0.00168                       | 0.0038                     | 0.0195                     |
| Cuneate Nucleus                                 | 0.0092                  | 0.0934              | 0.24                | -0.000196                      | 0.0936                     | 0.24                       |
| Dentate Gyrus Of Hippocampus                    | 0.18                    | 0.00242             | 0.0131              | -0.00154                       | 0.176                      | 0.366                      |
| Facial Nerve (Cranial Nerve 7)                  | 0.0164                  | 0.00263             | 0.0142              | -0.000321                      | 0.00476                    | 0.0237                     |
| Fasciculus Retroflexus                          | 0.0143                  | 0.00261             | 0.0141              | -0.000173                      | 0.06                       | 0.18                       |
| Fimbria                                         | 0.218                   | 0.00215             | 0.0118              | -0.00349                       | 0.0117                     | 0.0511                     |
| Fornix                                          | 0.0365                  | 0.000637            | 0.00386             | -0.000304                      | 0.136                      | 0.309                      |
| Fourth Ventricle                                | 0.0527                  | 0.0441              | 0.146               | -0.00111                       | 0.0481                     | 0.155                      |
| Fundus Of Striatum                              | -0.000288               | 0.907               | 0.957               | 3.79e-05                       | 0.44                       | 0.631                      |
| Globus Pallidus                                 | 0.131                   | 0.0156              | 0.0654              | -0.00132                       | 0.194                      | 0.389                      |
| Habenular Commissure                            | 0.0063                  | 0.009               | 0.041               | -4.12e-05                      | 0.38                       | 0.579                      |
| Hippocampus                                     | 0.632                   | 0.034               | 0.12                | -0.00725                       | 0.191                      | 0.385                      |
| Hypothalamus                                    | 0.497                   | 0.00295             | 0.0157              | -0.00348                       | 0.263                      | 0.468                      |
| Inferior Olivary Complex                        | 0.00618                 | 0.111               | 0.27                | -0.000235                      | 0.00316                    | 0.0167                     |
| Internal Capsule                                | 0.106                   | 0.0628              | 0.185               | -0.000764                      | 0.475                      | 0.663                      |
| Interpeduncular Nucleus                         | 0.00943                 | 0.156               | 0.339               | -7.28e-05                      | 0.582                      | 0.751                      |
| Lateral Olfactory Tract                         | 0.022                   | 0.0889              | 0.233               | -0.00012                       | 0.631                      | 0.789                      |
| Lateral Septum                                  | 0.181                   | 0.000413            | 0.00257             | -0.0025                        | 0.00839                    | 0.0387                     |
| Lateral Ventricle                               | 0.246                   | 0.019               | 0.076               | -0.00539                       | 0.00982                    | 0.0442                     |
| Mammillary Bodies                               | 0.00745                 | 0.466               | 0.653               | 0.000106                       | 0.6                        | 0.766                      |
| Mammillothalamic Tract                          | 0.00923                 | 0.0399              | 0.135               | -4.42e-06                      | 0.959                      | 0.982                      |
| Medial Lemniscus/Medial Longitudinal Fasciculus | 0.118                   | 0.0255              | 0.0954              | -0.00266                       | 0.00893                    | 0.0408                     |
| Medial Septum                                   | 0.0462                  | 0.0196              | 0.0772              | -0.000302                      | 0.418                      | 0.612                      |
| Medulla                                         | 1.45                    | 0.00972             | 0.0439              | -0.036                         | 0.0016                     | 0.00905                    |
| Midbrain                                        | 0.504                   | 0.0284              | 0.104               | -0.00491                       | 0.256                      | 0.461                      |
| Nucleus Accumbens                               | 0.063                   | 0.422               | 0.616               | 3.17e-05                       | 0.983                      | 0.993                      |
| Olfactory Bulbs                                 | 0.433                   | 0.327               | 0.53                | 0.0073                         | 0.404                      | 0.6                        |
| Olfactory Tubercle                              | 0.0446                  | 0.531               | 0.711               | 0.00041                        | 0.775                      | 0.882                      |
| Optic Tract                                     | 0.063                   | 0.0172              | 0.0703              | -0.000742                      | 0.135                      | 0.308                      |
| Periaqueductal Grey                             | 0.22                    | 0.0133              | 0.0569              | -0.0021                        | 0.237                      | 0.441                      |
| Pons                                            | 1.23                    | 0.000921            | 0.00546             | -0.021                         | 0.00445                    | 0.0224                     |
| Pontine Nucleus                                 | 0.0594                  | 0.00131             | 0.00756             | -0.000805                      | 0.0306                     | 0.111                      |
| Posterior Commissure                            | 0.00996                 | 0.0121              | 0.0529              | -0.000121                      | 0.119                      | 0.282                      |
| Pre-Para Subiculum                              | 0.0816                  | 0.105               | 0.26                | -0.000708                      | 0.473                      | 0.661                      |
| Stratum Granulosum Of Hippocampus               | 0.044                   | 0.00577             | 0.0279              | -0.000322                      | 0.3                        | 0.505                      |
| Stria Medullaris                                | 0.0442                  | 0.012               | 0.0524              | -0.000684                      | 0.0467                     | 0.152                      |
| Stria Terminalis                                | 0.0383                  | 0.0301              | 0.109               | -0.000282                      | 0.393                      | 0.59                       |
| Striatum                                        | 1.09                    | 0.00271             | 0.0145              | -0.00746                       | 0.272                      | 0.478                      |
| Subependymale Zone/ Rhinocoele                  | 0.00038                 | 0.8                 | 0.896               | 2.55e-05                       | 0.405                      | 0.601                      |
| Superior Olivary Complex                        | 0.0553                  | 2e-04               | 0.00127             | -0.000722                      | 0.0191                     | 0.0762                     |

| Structure                                         | $\beta_{SEX:70y:MET16}$ | $P_{SEX:70y:MET16}$ | $Q_{SEX:70y:MET16}$ | $\beta_{SEX:70y:MET16:Growth}$ | $P_{SEX:70y:MET16:Growth}$ | $Q_{SEX:70y:MET16:Growth}$ |
|---------------------------------------------------|-------------------------|---------------------|---------------------|--------------------------------|----------------------------|----------------------------|
| Thalamus                                          | 1.04                    | 0.00179             | 0.01                | - 0.0094                       | 0.136                      | 0.308                      |
| Third Ventricle                                   | 0.0695                  | 0.0291              | 0.106               | - 0.00077                      | 0.238                      | 0.442                      |
| Ventral Tegmental Decussation                     | 0.00583                 | 0.118               | 0.281               | - 5.86e-05                     | 0.429                      | 0.622                      |
| Lobules 1-2: Lingula And Central Lobule (Ventral) | 0.0531                  | 0.354               | 0.556               | 0.000456                       | 0.69                       | 0.827                      |
| Lobule 3: Central Lobule (Dorsal)                 | 0.103                   | 0.0874              | 0.231               | - 0.00138                      | 0.29                       | 0.496                      |
| Lobules 4-5: Culmen (Ventral And Dorsal)          | 0.311                   | 0.00344             | 0.0179              | - 0.00881                      | 7.87e-05                   | 0.000518                   |
| Lobule 6: Declive                                 | 0.131                   | 0.0579              | 0.176               | - 0.00479                      | 0.00119                    | 0.00689                    |
| Lobule 7: Tubercle (Or Folium)                    | 0.00145                 | 0.958               | 0.981               | - 5.59e-05                     | 0.923                      | 0.967                      |
| Lobule 8: Pyramis                                 | 0.000651                | 0.989               | 0.995               | 0.00108                        | 0.301                      | 0.506                      |
| Lobule 9: Uvula                                   | 0.0959                  | 0.187               | 0.379               | - 0.000525                     | 0.737                      | 0.858                      |
| Lobule 10: Nodulus                                | 0.116                   | 0.0107              | 0.0474              | - 0.00127                      | 0.194                      | 0.389                      |
| Anterior Lobule (Lobules 4-5)                     | 0.0619                  | 0.0722              | 0.203               | - 0.000319                     | 0.658                      | 0.804                      |
| Simple Lobule (Lobule 6)                          | 0.205                   | 0.0164              | 0.0678              | - 0.00385                      | 0.0314                     | 0.112                      |
| Crus 1: Ansiform Lobule (Lobule 6)                | 0.225                   | 0.013               | 0.0561              | - 0.00531                      | 0.00464                    | 0.0232                     |
| Crus 2: Ansiform Lobule (Lobule 7)                | 0.176                   | 0.0314              | 0.112               | - 0.00559                      | 0.00121                    | 0.00702                    |
| Paramedian Lobule (Lobule 7)                      | 0.145                   | 0.21                | 0.407               | - 0.0036                       | 0.136                      | 0.309                      |
| Copula: Pyramis (Lobule 8)                        | 0.0748                  | 0.226               | 0.425               | - 0.00137                      | 0.291                      | 0.497                      |
| Flocculus (Fl)                                    | 0.0519                  | 0.0276              | 0.102               | - 0.00109                      | 0.0196                     | 0.0773                     |
| Paraflocculus (Pfl)                               | 0.395                   | 0.00147             | 0.00839             | - 0.00202                      | 0.407                      | 0.603                      |
| Trunk Of Arbor Vita                               | 0.251                   | 0.0182              | 0.0731              | - 0.00408                      | 0.0695                     | 0.198                      |
| Lobule 1-2 White Matter                           | 0.0027                  | 0.516               | 0.699               | 9.93e-05                       | 0.225                      | 0.423                      |
| Lobule 3 White Matter                             | 0.00723                 | 0.391               | 0.588               | - 2.86e-05                     | 0.876                      | 0.943                      |
| Trunk Of Lobules 1-3 White Matter                 | 0.00732                 | 0.202               | 0.398               | - 7.14e-06                     | 0.953                      | 0.979                      |
| Lobules 4-5 White Matter                          | 0.0478                  | 0.0258              | 0.0959              | - 0.00115                      | 0.0151                     | 0.0637                     |
| Lobules 6-7 White Matter                          | 0.0357                  | 0.0942              | 0.241               | - 0.0011                       | 0.016                      | 0.0666                     |
| Lobule 8 White Matter                             | - 0.00159               | 0.649               | 0.799               | 8.35e-05                       | 0.262                      | 0.467                      |
| Trunk Of Lobules 6-8 White Matter                 | 0.00286                 | 0.385               | 0.583               | - 6.38e-06                     | 0.93                       | 0.97                       |
| Lobule 9 White Matter                             | 0.00684                 | 0.365               | 0.564               | 7.14e-05                       | 0.66                       | 0.805                      |
| Lobule 10 White Matter                            | 0.00932                 | 0.0102              | 0.0456              | - 7.89e-05                     | 0.312                      | 0.514                      |
| Anterior Lobule White Matter                      | 0.00459                 | 0.113               | 0.274               | - 2.34e-05                     | 0.701                      | 0.833                      |
| Simple Lobule White Matter                        | 0.0212                  | 0.0378              | 0.13                | - 0.000355                     | 0.0984                     | 0.249                      |
| Crus 1 White Matter                               | 0.0277                  | 0.017               | 0.0698              | - 0.000511                     | 0.0341                     | 0.12                       |
| Trunk Of Simple And Crus 1 White Matter           | 0.0107                  | 0.0376              | 0.129               | - 0.000181                     | 0.097                      | 0.246                      |
| Crus 2 White Matter                               | 0.0161                  | 0.0445              | 0.146               | - 0.000455                     | 0.00796                    | 0.037                      |
| Paramedian Lobule                                 | 0.0039                  | 0.397               | 0.593               | - 0.000165                     | 0.0864                     | 0.23                       |
| Trunk Of Crus 2 And Paramedian White Matter       | 0.0146                  | 0.128               | 0.297               | - 0.000356                     | 0.0813                     | 0.22                       |
| Copula White Matter                               | 0.00225                 | 0.392               | 0.589               | - 2.12e-05                     | 0.704                      | 0.835                      |
| Paraflocculus White Matter                        | 0.0255                  | 0.00938             | 0.0426              | - 0.000264                     | 0.178                      | 0.368                      |
| Flocculus White Matter                            | 0.00291                 | 0.106               | 0.261               | - 7.63e-05                     | 0.0312                     | 0.112                      |
| Dentate Nucleus                                   | 0.0194                  | 0.0293              | 0.107               | - 0.00047                      | 0.0152                     | 0.0639                     |
| Nucleus Interpositus                              | 0.0365                  | 0.0122              | 0.053               | - 0.000705                     | 0.0258                     | 0.096                      |
| Fastigial Nucleus                                 | 0.0331                  | 0.0127              | 0.0547              | - 0.000546                     | 0.0535                     | 0.167                      |
| Cingulate Cortex: Area 24A                        | 0.0958                  | 0.0161              | 0.0669              | - 0.000742                     | 0.324                      | 0.526                      |
| Cingulate Cortex: Area 24A'                       | 0.0426                  | 0.00722             | 0.0339              | - 0.000337                     | 0.278                      | 0.484                      |
| Cingulate Cortex: Area 24B                        | 0.0739                  | 0.0226              | 0.0869              | - 0.000572                     | 0.365                      | 0.564                      |
| Cingulate Cortex: Area 24B'                       | 0.0327                  | 0.0168              | 0.0692              | - 0.000243                     | 0.376                      | 0.575                      |
| Cingulate Cortex: Area 25                         | 0.0247                  | 0.0163              | 0.0672              | - 0.000153                     | 0.43                       | 0.622                      |
| Cingulate Cortex: Area 29A                        | 0.0605                  | 0.0179              | 0.072               | - 0.000485                     | 0.356                      | 0.557                      |
| Cingulate Cortex: Area 29B                        | 0.022                   | 0.0538              | 0.168               | - 0.000136                     | 0.549                      | 0.724                      |
| Cingulate Cortex: Area 29C                        | 0.0489                  | 0.181               | 0.371               | 7.48e-06                       | 0.992                      | 0.995                      |
| Cingulate Cortex: Area 30                         | 0.132                   | 0.031               | 0.112               | - 0.000762                     | 0.531                      | 0.711                      |
| Cingulate Cortex: Area 32                         | 0.16                    | 0.00739             | 0.0346              | - 0.00185                      | 0.115                      | 0.277                      |
| Amygdalopiriform Transition Area                  | 0.012                   | 0.494               | 0.678               | - 0.000161                     | 0.656                      | 0.803                      |

| Structure                                         | $\beta_{SEX \times Gy \times MET16}$ | $P_{SEX \times Gy \times MET16}$ | $q_{SEX \times Gy \times MET16}$ | $\beta_{SEX \times Gy \times MET16 \times Growth}$ | $P_{SEX \times Gy \times MET16 \times Growth}$ | $q_{SEX \times Gy \times MET16 \times Growth}$ |
|---------------------------------------------------|--------------------------------------|----------------------------------|----------------------------------|----------------------------------------------------|------------------------------------------------|------------------------------------------------|
| Primary Auditory Cortex                           | 0.0646                               | 0.02                             | 0.0785                           | -0.000561                                          | 0.307                                          | 0.51                                           |
| Secondary Auditory Cortex: Dorsal Area            | 0.0751                               | 0.0128                           | 0.0552                           | -0.000718                                          | 0.223                                          | 0.421                                          |
| Secondary Auditory Cortex: Ventral Area           | 0.064                                | 0.0908                           | 0.236                            | -0.000496                                          | 0.513                                          | 0.695                                          |
| Caudomedial Entorhinal Cortex                     | 0.105                                | 0.416                            | 0.61                             | -0.00175                                           | 0.49                                           | 0.676                                          |
| Cingulum                                          | 0.0501                               | 0.00129                          | 0.00745                          | -0.000456                                          | 0.126                                          | 0.293                                          |
| Clastrum                                          | 0.0169                               | 0.0627                           | 0.185                            | -0.000132                                          | 0.478                                          | 0.666                                          |
| Cortex-Amygdala Transition Zones                  | -0.00695                             | 0.724                            | 0.848                            | -0.000214                                          | 0.59                                           | 0.757                                          |
| Clastrum: Dorsal Part                             | 0.0102                               | 0.0517                           | 0.163                            | 9.08e-07                                           | 0.993                                          | 0.995                                          |
| Dorsal Nucleus Of The Endopiriform                | 0.024                                | 0.271                            | 0.476                            | 0.000282                                           | 0.495                                          | 0.68                                           |
| Dorsal Intermediate Entorhinal Cortex             | 0.0481                               | 0.2                              | 0.395                            | -0.00123                                           | 0.101                                          | 0.254                                          |
| Dorsolateral Entorhinal Cortex                    | 0.0916                               | 0.0561                           | 0.173                            | -0.00155                                           | 0.0986                                         | 0.249                                          |
| Dorsolateral Orbital Cortex                       | 0.0355                               | 0.168                            | 0.354                            | -0.000755                                          | 0.17                                           | 0.358                                          |
| Dorsal Tenia Tecta                                | 0.0131                               | 0.352                            | 0.554                            | -4.4e-05                                           | 0.869                                          | 0.939                                          |
| Ectorhinal Cortex                                 | 0.0359                               | 0.442                            | 0.632                            | -0.000455                                          | 0.614                                          | 0.775                                          |
| Frontal Cortex: Area 3                            | 0.0377                               | 0.0118                           | 0.0515                           | -0.000549                                          | 0.0652                                         | 0.19                                           |
| Frontal Association Cortex                        | 0.431                                | 0.0317                           | 0.113                            | -0.00741                                           | 0.0767                                         | 0.212                                          |
| Intermediate Nucleus Of The Endopiriform Clastrum | 0.00323                              | 0.758                            | 0.87                             | 0.000254                                           | 0.241                                          | 0.447                                          |
| Insular Region: Not Subdivided                    | 0.321                                | 0.0182                           | 0.0733                           | -0.00181                                           | 0.483                                          | 0.67                                           |
| Lateral Orbital Cortex                            | 0.194                                | 0.0566                           | 0.174                            | -0.00409                                           | 0.0556                                         | 0.172                                          |
| Lateral Parietal Association Cortex               | 0.0136                               | 0.0043                           | 0.0217                           | -0.000122                                          | 0.202                                          | 0.398                                          |
| Primary Motor Cortex                              | 0.433                                | 0.00217                          | 0.0119                           | -0.00381                                           | 0.166                                          | 0.352                                          |
| Secondary Motor Cortex                            | 0.408                                | 0.00116                          | 0.00678                          | -0.00247                                           | 0.309                                          | 0.511                                          |
| Medial Entorhinal Cortex                          | 0.012                                | 0.561                            | 0.732                            | -0.000659                                          | 0.11                                           | 0.269                                          |
| Medial Orbital Cortex                             | 0.114                                | 0.0217                           | 0.0842                           | -0.002                                             | 0.0476                                         | 0.154                                          |
| Medial Parietal Association Cortex                | 0.0312                               | 0.000814                         | 0.00489                          | -0.000273                                          | 0.153                                          | 0.334                                          |
| Piriform Cortex                                   | 0.124                                | 0.463                            | 0.651                            | 0.000188                                           | 0.954                                          | 0.98                                           |
| Posterolateral Cortical Amygdaloid Area           | 0.0297                               | 0.27                             | 0.475                            | -0.000688                                          | 0.206                                          | 0.402                                          |
| Posteromedial Cortical Amygdaloid Area            | 0.0232                               | 0.391                            | 0.588                            | -0.000857                                          | 0.105                                          | 0.26                                           |
| Perirhinal Cortex                                 | 0.038                                | 0.393                            | 0.59                             | -0.000533                                          | 0.536                                          | 0.714                                          |
| Parietal Cortex: Posterior Area: Rostral Part     | 0.0056                               | 0.00638                          | 0.0305                           | -4.36e-05                                          | 0.287                                          | 0.494                                          |
| Rostral Amygdalopiriform Area                     | 0.00558                              | 0.651                            | 0.8                              | -8.6e-05                                           | 0.738                                          | 0.858                                          |
| Primary Somatosensory Cortex                      | 0.229                                | 0.00423                          | 0.0215                           | -0.00304                                           | 0.0514                                         | 0.163                                          |
| Primary Somatosensory Cortex: Barrel Field        | 0.473                                | 0.00427                          | 0.0217                           | -0.00457                                           | 0.15                                           | 0.331                                          |
| Primary Somatosensory Cortex: Dysgranular Zone    | 0.0189                               | 0.00331                          | 0.0172                           | -0.000137                                          | 0.27                                           | 0.475                                          |
| Primary Somatosensory Cortex: Forelimb Region     | 0.256                                | 0.00189                          | 0.0106                           | -0.00232                                           | 0.15                                           | 0.331                                          |
| Primary Somatosensory Cortex: Hindlimb Region     | 0.177                                | 0.00174                          | 0.00979                          | -0.00189                                           | 0.091                                          | 0.236                                          |
| Primary Somatosensory Cortex: Jaw Region          | 0.0402                               | 0.00411                          | 0.0209                           | -0.000457                                          | 0.0996                                         | 0.251                                          |
| Primary Somatosensory Cortex: Shoulder Region     | 0.0125                               | 0.0162                           | 0.0669                           | -0.00012                                           | 0.238                                          | 0.442                                          |
| Primary Somatosensory Cortex: Trunk Region        | 0.0318                               | 0.0048                           | 0.0238                           | -0.000251                                          | 0.263                                          | 0.467                                          |
| Primary Somatosensory Cortex: Upper Lip Region    | 0.251                                | 0.00656                          | 0.0313                           | -0.0041                                            | 0.0207                                         | 0.0811                                         |
| Secondary Somatosensory Cortex                    | 0.26                                 | 0.0132                           | 0.0564                           | -0.00325                                           | 0.101                                          | 0.252                                          |
| Temporal Association Area                         | 0.047                                | 0.397                            | 0.593                            | -0.000219                                          | 0.84                                           | 0.921                                          |
| Primary Visual Cortex                             | 0.0646                               | 0.253                            | 0.458                            | -0.000494                                          | 0.655                                          | 0.802                                          |
| Primary Visual Cortex: Binocular Area             | 0.0807                               | 0.0535                           | 0.167                            | -0.000839                                          | 0.303                                          | 0.507                                          |
| Primary Visual Cortex: Monocular Area             | 0.13                                 | 0.00397                          | 0.0203                           | -0.00138                                           | 0.12                                           | 0.285                                          |
| Secondary Visual Cortex: Lateral Area             | 0.0895                               | 0.107                            | 0.262                            | -0.000604                                          | 0.575                                          | 0.744                                          |
| Secondary Visual Cortex: Mediolateral Area        | 0.0648                               | 0.00623                          | 0.0299                           | -0.000334                                          | 0.479                                          | 0.666                                          |
| Secondary Visual Cortex: Mediomedial Area         | 0.1                                  | 0.0515                           | 0.163                            | -0.00045                                           | 0.66                                           | 0.805                                          |
| Clastrum: Ventral Part                            | 0.0253                               | 0.0371                           | 0.128                            | 9.73e-05                                           | 0.666                                          | 0.808                                          |
| Ventral Nucleus Of The Endopiriform Clastrum      | 0.00763                              | 0.378                            | 0.578                            | -5.87e-06                                          | 0.972                                          | 0.989                                          |
| Ventral Intermediate Entorhinal Cortex            | 0.0179                               | 0.474                            | 0.662                            | -0.000992                                          | 0.051                                          | 0.162                                          |
| Ventral Orbital Cortex                            | 0.0765                               | 0.0239                           | 0.0907                           | -0.00129                                           | 0.0574                                         | 0.175                                          |
| Ventral Tenia Tecta                               | 0.00171                              | 0.492                            | 0.677                            | -3.45e-05                                          | 0.495                                          | 0.68                                           |

**Supplementary Table S.4** Table of 159 segmented atlas structures. Columns of the table contain information for the coefficients estimates for the three-way or four-way interaction effects of sex, radiation, age and metformin treatment (MET16) and corresponding test statistics: p value (p) and FDR adjusted p values (q).

| Structure                                       | $\beta_{\text{SEX:7Qy:MET19}}$ | $P_{\text{SEX:7Qy:MET19}}$ | $q_{\text{SEX:7Qy:MET19}}$ | $\beta_{\text{SEX:7Qy:MET19:Growth}}$ | $P_{\text{SEX:7Qy:MET19:Growth}}$ | $q_{\text{SEX:7Qy:MET19:Growth}}$ |
|-------------------------------------------------|--------------------------------|----------------------------|----------------------------|---------------------------------------|-----------------------------------|-----------------------------------|
| Amygdala                                        | 0.15                           | 0.366                      | 0.565                      | -0.00196                              | 0.55                              | 0.724                             |
| Anterior Commissure: Pars Anterior              | 0.00631                        | 0.797                      | 0.894                      | 0.000419                              | 0.399                             | 0.595                             |
| Anterior Commissure: Pars Posterior             | 0.00201                        | 0.799                      | 0.895                      | 3.94e-05                              | 0.808                             | 0.901                             |
| Basal Forebrain                                 | 0.257                          | 0.00493                    | 0.0243                     | -0.00215                              | 0.235                             | 0.438                             |
| Bed Nucleus Of Stria Terminalis                 | 0.043                          | 0.0945                     | 0.242                      | -0.000408                             | 0.429                             | 0.622                             |
| Cerebellar Peduncle: Inferior                   | 0.027                          | 0.168                      | 0.354                      | -0.00078                              | 0.0623                            | 0.184                             |
| Cerebellar Peduncle: Middle                     | 0.00872                        | 0.786                      | 0.889                      | -0.000502                             | 0.451                             | 0.64                              |
| Cerebellar Peduncle: Superior                   | 0.0188                         | 0.371                      | 0.57                       | -0.000512                             | 0.237                             | 0.441                             |
| Cerebral Aqueduct                               | 0.0162                         | 0.359                      | 0.56                       | -0.000431                             | 0.26                              | 0.467                             |
| Cerebral Peduncle                               | -0.00228                       | 0.955                      | 0.98                       | 0.000347                              | 0.666                             | 0.808                             |
| Colliculus: Inferior                            | 0.102                          | 0.312                      | 0.513                      | -0.00209                              | 0.333                             | 0.533                             |
| Colliculus: Superior                            | 0.385                          | 0.122                      | 0.286                      | -0.00609                              | 0.245                             | 0.451                             |
| Corpus Callosum                                 | 0.126                          | 0.546                      | 0.721                      | -0.000255                             | 0.95                              | 0.979                             |
| Corticospinal Tract/Pyramids                    | 0.0493                         | 0.0971                     | 0.247                      | -0.000526                             | 0.388                             | 0.587                             |
| Cuneate Nucleus                                 | 0.0105                         | 0.0595                     | 0.179                      | -0.000251                             | 0.0406                            | 0.137                             |
| Dentate Gyrus Of Hippocampus                    | 0.0618                         | 0.302                      | 0.506                      | -0.00147                              | 0.22                              | 0.418                             |
| Facial Nerve (Cranial Nerve 7)                  | 0.00452                        | 0.409                      | 0.605                      | -0.00016                              | 0.178                             | 0.368                             |
| Fasciculus Retroflexus                          | 0.0146                         | 0.00237                    | 0.0129                     | -0.000209                             | 0.0311                            | 0.112                             |
| Fimbria                                         | 0.00222                        | 0.975                      | 0.991                      | -2.6e-05                              | 0.986                             | 0.994                             |
| Fornix                                          | 0.0146                         | 0.174                      | 0.363                      | -0.000209                             | 0.33                              | 0.532                             |
| Fourth Ventricle                                | 0.0532                         | 0.0444                     | 0.146                      | -0.00134                              | 0.0226                            | 0.0869                            |
| Fundus Of Striatum                              | 0.00148                        | 0.554                      | 0.727                      | 2.19e-05                              | 0.671                             | 0.813                             |
| Globus Pallidus                                 | -0.0253                        | 0.644                      | 0.796                      | 0.000632                              | 0.553                             | 0.726                             |
| Habenular Commissure                            | 0.0036                         | 0.139                      | 0.313                      | -4.63e-05                             | 0.349                             | 0.551                             |
| Hippocampus                                     | 0.143                          | 0.634                      | 0.79                       | -0.0041                               | 0.482                             | 0.669                             |
| Hypothalamus                                    | 0.308                          | 0.0682                     | 0.196                      | -0.0021                               | 0.521                             | 0.702                             |
| Inferior Olivary Complex                        | 0.00573                        | 0.144                      | 0.32                       | -0.000103                             | 0.216                             | 0.413                             |
| Internal Capsule                                | -0.0358                        | 0.533                      | 0.712                      | 0.00125                               | 0.266                             | 0.47                              |
| Interpeduncular Nucleus                         | 0.00574                        | 0.393                      | 0.59                       | -5.49e-05                             | 0.693                             | 0.828                             |
| Lateral Olfactory Tract                         | 0.0012                         | 0.927                      | 0.968                      | 0.000167                              | 0.523                             | 0.704                             |
| Lateral Septum                                  | 0.0348                         | 0.499                      | 0.683                      | -0.00138                              | 0.165                             | 0.351                             |
| Lateral Ventricle                               | -0.00935                       | 0.93                       | 0.97                       | 7.09e-05                              | 0.974                             | 0.991                             |
| Mammillary Bodies                               | 0.00853                        | 0.41                       | 0.605                      | -2.57e-05                             | 0.904                             | 0.956                             |
| Mammillothalamic Tract                          | 0.00752                        | 0.0973                     | 0.247                      | -7.42e-05                             | 0.41                              | 0.605                             |
| Medial Lemniscus/Medial Longitudinal Fasciculus | 0.0817                         | 0.125                      | 0.291                      | -0.000641                             | 0.548                             | 0.723                             |
| Medial Septum                                   | 0.0396                         | 0.0476                     | 0.154                      | -0.000252                             | 0.52                              | 0.702                             |
| Medulla                                         | 1                              | 0.0775                     | 0.214                      | -0.0195                               | 0.103                             | 0.257                             |
| Midbrain                                        | 0.317                          | 0.173                      | 0.361                      | -0.00378                              | 0.405                             | 0.601                             |
| Nucleus Accumbens                               | 0.136                          | 0.0856                     | 0.228                      | -0.000722                             | 0.653                             | 0.801                             |
| Olfactory Bulbs                                 | -0.136                         | 0.761                      | 0.872                      | 0.00651                               | 0.479                             | 0.666                             |
| Olfactory Tubercle                              | 0.142                          | 0.0483                     | 0.155                      | -0.00119                              | 0.431                             | 0.623                             |
| Optic Tract                                     | 0.00888                        | 0.739                      | 0.858                      | -9.79e-05                             | 0.851                             | 0.927                             |
| Periaqueductal Grey                             | 0.162                          | 0.0713                     | 0.201                      | -0.0026                               | 0.164                             | 0.349                             |
| Pons                                            | 0.52                           | 0.163                      | 0.349                      | -0.0147                               | 0.057                             | 0.175                             |
| Pontine Nucleus                                 | 0.0283                         | 0.129                      | 0.297                      | -0.000612                             | 0.117                             | 0.28                              |
| Posterior Commissure                            | 0.00817                        | 0.0419                     | 0.14                       | -0.000121                             | 0.138                             | 0.311                             |
| Pre-Para Subiculum                              | 0.0297                         | 0.559                      | 0.731                      | -0.00103                              | 0.322                             | 0.525                             |
| Stratum Granulosum Of Hippocampus               | 0.0193                         | 0.229                      | 0.43                       | -0.000393                             | 0.228                             | 0.429                             |
| Stria Medullaris                                | 0.0321                         | 0.0708                     | 0.2                        | -0.00042                              | 0.245                             | 0.451                             |
| Stria Terminalis                                | -0.000621                      | 0.972                      | 0.989                      | 0.000385                              | 0.267                             | 0.471                             |
| Striatum                                        | 0.278                          | 0.448                      | 0.637                      | -0.000102                             | 0.989                             | 0.995                             |
| Subependymale Zone / Rhinocoele                 | 0.000193                       | 0.898                      | 0.954                      | 5.56e-05                              | 0.084                             | 0.225                             |
| Superior Olivary Complex                        | 0.0361                         | 0.0161                     | 0.0669                     | -0.000608                             | 0.0601                            | 0.18                              |



| Structure                                         | $\beta_{\text{SEX:7Qy:MET19}}$ | $P_{\text{SEX:7Qy:MET19}}$ | $q_{\text{SEX:7Qy:MET19}}$ | $\beta_{\text{SEX:7Qy:MET19:Growth}}$ | $P_{\text{SEX:7Qy:MET19:Growth}}$ | $q_{\text{SEX:7Qy:MET19:Growth}}$ |
|---------------------------------------------------|--------------------------------|----------------------------|----------------------------|---------------------------------------|-----------------------------------|-----------------------------------|
| Thalamus                                          | 0.591                          | 0.0776                     | 0.214                      | -0.00885                              | 0.181                             | 0.372                             |
| Third Ventricle                                   | 0.0245                         | 0.447                      | 0.636                      | 1.86e-05                              | 0.978                             | 0.993                             |
| Ventral Tegmental Decussation                     | 0.00112                        | 0.765                      | 0.876                      | -5.55e-05                             | 0.476                             | 0.664                             |
| Lobules 1-2: Lingula And Central Lobule (Ventral) | 0.0071                         | 0.902                      | 0.955                      | -0.000841                             | 0.485                             | 0.672                             |
| Lobule 3: Central Lobule (Dorsal)                 | 0.0378                         | 0.534                      | 0.713                      | -0.00137                              | 0.314                             | 0.515                             |
| Lobules 4-5: Culmen (Ventral And Dorsal)          | 0.237                          | 0.0269                     | 0.0995                     | -0.00532                              | 0.0225                            | 0.0867                            |
| Lobule 6: Declive                                 | 0.128                          | 0.068                      | 0.196                      | -0.00261                              | 0.0915                            | 0.237                             |
| Lobule 7: Tuber (Or Folium)                       | 0.0448                         | 0.103                      | 0.257                      | -8.11e-05                             | 0.894                             | 0.952                             |
| Lobule 8: Pyramis                                 | 0.0535                         | 0.283                      | 0.49                       | -0.000402                             | 0.713                             | 0.842                             |
| Lobule 9: Uvula                                   | 0.106                          | 0.149                      | 0.328                      | -0.00179                              | 0.276                             | 0.482                             |
| Lobule 10: Nodulus                                | 0.096                          | 0.0374                     | 0.129                      | -0.00241                              | 0.0194                            | 0.0766                            |
| Anterior Lobule (Lobules 4-5)                     | 0.0213                         | 0.54                       | 0.717                      | 1.95e-05                              | 0.979                             | 0.993                             |
| Simple Lobule (Lobule 6)                          | 0.0929                         | 0.283                      | 0.49                       | -0.00192                              | 0.305                             | 0.508                             |
| Crus 1: Ansiform Lobule (Lobule 6)                | 0.126                          | 0.168                      | 0.353                      | -0.00394                              | 0.0449                            | 0.147                             |
| Crus 2: Ansiform Lobule (Lobule 7)                | 0.128                          | 0.122                      | 0.287                      | -0.0031                               | 0.0863                            | 0.23                              |
| Paramedian Lobule (Lobule 7)                      | 0.114                          | 0.331                      | 0.532                      | -0.00362                              | 0.154                             | 0.336                             |
| Copula: Pyramis (Lobule 8)                        | 0.0582                         | 0.352                      | 0.554                      | -0.00201                              | 0.141                             | 0.316                             |
| Flocculus (Fl)                                    | 0.0241                         | 0.312                      | 0.513                      | -0.000846                             | 0.0838                            | 0.225                             |
| Paraflocculus (Pfl)                               | 0.304                          | 0.0153                     | 0.0642                     | -0.00445                              | 0.0824                            | 0.222                             |
| Trunk Of Arbor Vita                               | 0.152                          | 0.157                      | 0.342                      | -0.00281                              | 0.233                             | 0.436                             |
| Lobule 1-2 White Matter                           | -0.000408                      | 0.923                      | 0.967                      | -5.77e-05                             | 0.502                             | 0.685                             |
| Lobule 3 White Matter                             | 0.00246                        | 0.773                      | 0.882                      | -0.000174                             | 0.366                             | 0.565                             |
| Trunk Of Lobules 1-3 White Matter                 | 0.00199                        | 0.731                      | 0.854                      | -6.14e-05                             | 0.63                              | 0.789                             |
| Lobules 4-5 White Matter                          | 0.0368                         | 0.0895                     | 0.234                      | -0.000713                             | 0.15                              | 0.33                              |
| Lobules 6-7 White Matter                          | 0.0452                         | 0.0365                     | 0.127                      | -0.000689                             | 0.151                             | 0.332                             |
| Lobule 8 White Matter                             | 0.00456                        | 0.199                      | 0.395                      | -5.04e-05                             | 0.519                             | 0.701                             |
| Trunk Of Lobules 6-8 White Matter                 | 0.00433                        | 0.196                      | 0.391                      | -5.2e-05                              | 0.499                             | 0.683                             |
| Lobule 9 White Matter                             | 0.00544                        | 0.476                      | 0.664                      | -0.000126                             | 0.461                             | 0.649                             |
| Lobule 10 White Matter                            | 0.00619                        | 0.0913                     | 0.237                      | -0.000166                             | 0.043                             | 0.143                             |
| Anterior Lobule White Matter                      | 0.00192                        | 0.512                      | 0.695                      | -1.36e-05                             | 0.832                             | 0.915                             |
| Simple Lobule White Matter                        | 0.0117                         | 0.258                      | 0.465                      | -0.000159                             | 0.479                             | 0.666                             |
| Crus 1 White Matter                               | 0.0176                         | 0.133                      | 0.304                      | -0.000432                             | 0.0875                            | 0.231                             |
| Trunk Of Simple And Crus 1 White Matter           | 0.00763                        | 0.143                      | 0.32                       | -0.000173                             | 0.132                             | 0.303                             |
| Crus 2 White Matter                               | 0.0107                         | 0.186                      | 0.378                      | -0.000283                             | 0.115                             | 0.277                             |
| Paramedian Lobule                                 | 0.00448                        | 0.336                      | 0.537                      | -0.000129                             | 0.202                             | 0.398                             |
| Trunk Of Crus 2 And Paramedian White Matter       | 0.00945                        | 0.33                       | 0.532                      | -0.000297                             | 0.165                             | 0.351                             |
| Copula White Matter                               | 0.0029                         | 0.276                      | 0.482                      | -6.32e-05                             | 0.28                              | 0.486                             |
| Paraflocculus White Matter                        | 0.0186                         | 0.0609                     | 0.182                      | -0.000426                             | 0.0393                            | 0.134                             |
| Flocculus White Matter                            | 0.00187                        | 0.305                      | 0.508                      | -7.46e-05                             | 0.0448                            | 0.147                             |
| Dentate Nucleus                                   | 0.0102                         | 0.26                       | 0.466                      | -0.000281                             | 0.165                             | 0.351                             |
| Nucleus Interpositus                              | 0.0229                         | 0.12                       | 0.284                      | -0.00032                              | 0.335                             | 0.535                             |
| Fastigial Nucleus                                 | 0.0246                         | 0.0667                     | 0.193                      | -0.000411                             | 0.166                             | 0.352                             |
| Cingulate Cortex: Area 24A                        | 0.0924                         | 0.0218                     | 0.0843                     | -0.000866                             | 0.273                             | 0.478                             |
| Cingulate Cortex: Area 24A'                       | 0.0354                         | 0.0271                     | 0.0999                     | -0.000421                             | 0.198                             | 0.394                             |
| Cingulate Cortex: Area 24B                        | 0.0968                         | 0.0032                     | 0.0169                     | -0.000814                             | 0.22                              | 0.418                             |
| Cingulate Cortex: Area 24B'                       | 0.0381                         | 0.00597                    | 0.0288                     | -0.000351                             | 0.223                             | 0.421                             |
| Cingulate Cortex: Area 25                         | 0.0145                         | 0.161                      | 0.346                      | -0.000189                             | 0.352                             | 0.554                             |
| Cingulate Cortex: Area 29A                        | 0.0685                         | 0.00816                    | 0.0377                     | -0.00131                              | 0.0179                            | 0.072                             |
| Cingulate Cortex: Area 29B                        | 0.0263                         | 0.0225                     | 0.0867                     | -0.000499                             | 0.0369                            | 0.128                             |
| Cingulate Cortex: Area 29C                        | 0.0955                         | 0.00995                    | 0.0446                     | -0.00144                              | 0.0642                            | 0.188                             |
| Cingulate Cortex: Area 30                         | 0.131                          | 0.0349                     | 0.122                      | -0.00232                              | 0.0699                            | 0.198                             |
| Cingulate Cortex: Area 32                         | 0.14                           | 0.0201                     | 0.0788                     | -0.00175                              | 0.156                             | 0.341                             |
| Amygdalopiriform Transition Area                  | 0.00252                        | 0.887                      | 0.947                      | -0.000251                             | 0.508                             | 0.69                              |

| Structure                                         | $\beta_{\text{SEX} \times \text{Gy} \times \text{MET19}}$ | $p_{\text{SEX} \times \text{Gy} \times \text{MET19}}$ | $q_{\text{SEX} \times \text{Gy} \times \text{MET19}}$ | $\beta_{\text{SEX} \times \text{Gy} \times \text{MET19} \times \text{Growth}}$ | $p_{\text{SEX} \times \text{Gy} \times \text{MET19} \times \text{Growth}}$ | $q_{\text{SEX} \times \text{Gy} \times \text{MET19} \times \text{Growth}}$ |
|---------------------------------------------------|-----------------------------------------------------------|-------------------------------------------------------|-------------------------------------------------------|--------------------------------------------------------------------------------|----------------------------------------------------------------------------|----------------------------------------------------------------------------|
| Primary Auditory Cortex                           | 0.031                                                     | 0.269                                                 | 0.474                                                 | -0.00022                                                                       | 0.703                                                                      | 0.834                                                                      |
| Secondary Auditory Cortex: Dorsal Area            | 0.0313                                                    | 0.304                                                 | 0.508                                                 | -0.000233                                                                      | 0.707                                                                      | 0.838                                                                      |
| Secondary Auditory Cortex: Ventral Area           | 0.0399                                                    | 0.297                                                 | 0.502                                                 | -0.000464                                                                      | 0.56                                                                       | 0.732                                                                      |
| Caudomedial Entorhinal Cortex                     | -0.0841                                                   | 0.521                                                 | 0.702                                                 | 0.00121                                                                        | 0.65                                                                       | 0.799                                                                      |
| Cingulum                                          | 0.0199                                                    | 0.205                                                 | 0.401                                                 | -0.00041                                                                       | 0.19                                                                       | 0.384                                                                      |
| Clastrum                                          | 0.0119                                                    | 0.194                                                 | 0.389                                                 | -0.000173                                                                      | 0.376                                                                      | 0.575                                                                      |
| Cortex-Amygdala Transition Zones                  | 0.0192                                                    | 0.334                                                 | 0.535                                                 | -0.000306                                                                      | 0.465                                                                      | 0.652                                                                      |
| Clastrum: Dorsal Part                             | 0.00714                                                   | 0.178                                                 | 0.368                                                 | -3.47e-05                                                                      | 0.739                                                                      | 0.858                                                                      |
| Dorsal Nucleus Of The Endopiriform                | 0.0313                                                    | 0.156                                                 | 0.34                                                  | 8.89e-05                                                                       | 0.838                                                                      | 0.919                                                                      |
| Dorsal Intermediate Entorhinal Cortex             | -0.0168                                                   | 0.658                                                 | 0.804                                                 | -0.000804                                                                      | 0.307                                                                      | 0.51                                                                       |
| Dorsolateral Entorhinal Cortex                    | -0.0324                                                   | 0.503                                                 | 0.686                                                 | -0.000427                                                                      | 0.665                                                                      | 0.808                                                                      |
| Dorsolateral Orbital Cortex                       | 0.0281                                                    | 0.281                                                 | 0.487                                                 | -0.000677                                                                      | 0.242                                                                      | 0.447                                                                      |
| Dorsal Tenia Tecta                                | 0.0262                                                    | 0.0659                                                | 0.192                                                 | -0.000161                                                                      | 0.567                                                                      | 0.737                                                                      |
| Ectorhinal Cortex                                 | -0.00103                                                  | 0.983                                                 | 0.993                                                 | -2.87e-05                                                                      | 0.976                                                                      | 0.991                                                                      |
| Frontal Cortex: Area 3                            | 0.0306                                                    | 0.043                                                 | 0.143                                                 | -0.000591                                                                      | 0.0587                                                                     | 0.177                                                                      |
| Frontal Association Cortex                        | 0.356                                                     | 0.0797                                                | 0.217                                                 | -0.00963                                                                       | 0.0287                                                                     | 0.105                                                                      |
| Intermediate Nucleus Of The Endopiriform Clastrum | 0.0135                                                    | 0.203                                                 | 0.398                                                 | 1.63e-05                                                                       | 0.943                                                                      | 0.976                                                                      |
| Insular Region: Not Subdivided                    | 0.294                                                     | 0.0322                                                | 0.115                                                 | -0.00348                                                                       | 0.199                                                                      | 0.395                                                                      |
| Lateral Orbital Cortex                            | 0.191                                                     | 0.0646                                                | 0.189                                                 | -0.00355                                                                       | 0.113                                                                      | 0.273                                                                      |
| Lateral Parietal Association Cortex               | 0.012                                                     | 0.0125                                                | 0.0541                                                | -0.000142                                                                      | 0.16                                                                       | 0.344                                                                      |
| Primary Motor Cortex                              | 0.428                                                     | 0.00269                                               | 0.0145                                                | -0.00549                                                                       | 0.0579                                                                     | 0.176                                                                      |
| Secondary Motor Cortex                            | 0.44                                                      | 0.00054                                               | 0.00332                                               | -0.0052                                                                        | 0.042                                                                      | 0.14                                                                       |
| Medial Entorhinal Cortex                          | 0.000792                                                  | 0.97                                                  | 0.989                                                 | -0.000129                                                                      | 0.766                                                                      | 0.876                                                                      |
| Medial Orbital Cortex                             | 0.0774                                                    | 0.123                                                 | 0.289                                                 | -0.00144                                                                       | 0.175                                                                      | 0.364                                                                      |
| Medial Parietal Association Cortex                | 0.0256                                                    | 0.0066                                                | 0.0315                                                | -0.000379                                                                      | 0.0584                                                                     | 0.177                                                                      |
| Piriform Cortex                                   | 0.125                                                     | 0.464                                                 | 0.652                                                 | 0.000928                                                                       | 0.787                                                                      | 0.889                                                                      |
| Posterolateral Cortical Amygdaloid Area           | 0.0346                                                    | 0.203                                                 | 0.399                                                 | -0.00091                                                                       | 0.111                                                                      | 0.271                                                                      |
| Posteromedial Cortical Amygdaloid Area            | 0.0267                                                    | 0.328                                                 | 0.53                                                  | -0.000702                                                                      | 0.206                                                                      | 0.403                                                                      |
| Perirhinal Cortex                                 | 0.000948                                                  | 0.983                                                 | 0.993                                                 | -0.000399                                                                      | 0.66                                                                       | 0.805                                                                      |
| Parietal Cortex: Posterior Area: Rostral Part     | 0.005                                                     | 0.016                                                 | 0.0666                                                | -4.14e-05                                                                      | 0.336                                                                      | 0.537                                                                      |
| Rostral Amygdalopiriform Area                     | 0.00531                                                   | 0.671                                                 | 0.812                                                 | -0.00033                                                                       | 0.223                                                                      | 0.421                                                                      |
| Primary Somatosensory Cortex                      | 0.179                                                     | 0.0268                                                | 0.0992                                                | -0.00326                                                                       | 0.0468                                                                     | 0.152                                                                      |
| Primary Somatosensory Cortex: Barrel Field        | 0.31                                                      | 0.0632                                                | 0.186                                                 | -0.00263                                                                       | 0.432                                                                      | 0.623                                                                      |
| Primary Somatosensory Cortex: Dysgranular Zone    | 0.0179                                                    | 0.00607                                               | 0.0291                                                | -0.00023                                                                       | 0.0794                                                                     | 0.217                                                                      |
| Primary Somatosensory Cortex: Forelimb Region     | 0.206                                                     | 0.0135                                                | 0.0574                                                | -0.00245                                                                       | 0.148                                                                      | 0.327                                                                      |
| Primary Somatosensory Cortex: Hindlimb Region     | 0.128                                                     | 0.0253                                                | 0.0947                                                | -0.00137                                                                       | 0.246                                                                      | 0.451                                                                      |
| Primary Somatosensory Cortex: Jaw Region          | 0.0384                                                    | 0.00663                                               | 0.0316                                                | -0.000585                                                                      | 0.0451                                                                     | 0.148                                                                      |
| Primary Somatosensory Cortex: Shoulder Region     | 0.011                                                     | 0.0363                                                | 0.126                                                 | -0.000104                                                                      | 0.328                                                                      | 0.53                                                                       |
| Primary Somatosensory Cortex: Trunk Region        | 0.0269                                                    | 0.0183                                                | 0.0734                                                | -0.000244                                                                      | 0.3                                                                        | 0.505                                                                      |
| Primary Somatosensory Cortex: Upper Lip Region    | 0.21                                                      | 0.0244                                                | 0.092                                                 | -0.00319                                                                       | 0.0865                                                                     | 0.23                                                                       |
| Secondary Somatosensory Cortex                    | 0.173                                                     | 0.102                                                 | 0.255                                                 | -0.00223                                                                       | 0.284                                                                      | 0.49                                                                       |
| Temporal Association Area                         | 0.00229                                                   | 0.967                                                 | 0.987                                                 | 1.05e-05                                                                       | 0.993                                                                      | 0.995                                                                      |
| Primary Visual Cortex                             | 0.0627                                                    | 0.272                                                 | 0.478                                                 | -0.000611                                                                      | 0.599                                                                      | 0.765                                                                      |
| Primary Visual Cortex: Binocular Area             | 0.0848                                                    | 0.0449                                                | 0.147                                                 | -0.000689                                                                      | 0.42                                                                       | 0.615                                                                      |
| Primary Visual Cortex: Monocular Area             | 0.124                                                     | 0.00683                                               | 0.0323                                                | -0.00126                                                                       | 0.175                                                                      | 0.364                                                                      |
| Secondary Visual Cortex: Lateral Area             | 0.0459                                                    | 0.412                                                 | 0.607                                                 | -0.00015                                                                       | 0.895                                                                      | 0.952                                                                      |
| Secondary Visual Cortex: Mediolateral Area        | 0.0634                                                    | 0.00815                                               | 0.0377                                                | -0.000637                                                                      | 0.199                                                                      | 0.395                                                                      |
| Secondary Visual Cortex: Mediomedial Area         | 0.0937                                                    | 0.0725                                                | 0.203                                                 | -0.00108                                                                       | 0.315                                                                      | 0.517                                                                      |
| Clastrum: Ventral Part                            | 0.0216                                                    | 0.0777                                                | 0.214                                                 | -5.91e-05                                                                      | 0.803                                                                      | 0.897                                                                      |
| Ventral Nucleus Of The Endopiriform Clastrum      | -0.00202                                                  | 0.818                                                 | 0.906                                                 | 0.000161                                                                       | 0.36                                                                       | 0.561                                                                      |
| Ventral Intermediate Entorhinal Cortex            | 0.0018                                                    | 0.943                                                 | 0.976                                                 | -0.000522                                                                      | 0.327                                                                      | 0.53                                                                       |
| Ventral Orbital Cortex                            | 0.0683                                                    | 0.0461                                                | 0.15                                                  | -0.000657                                                                      | 0.356                                                                      | 0.557                                                                      |
| Ventral Tenia Tecta                               | 0.00441                                                   | 0.0801                                                | 0.218                                                 | -6.61e-05                                                                      | 0.213                                                                      | 0.411                                                                      |

**Supplementary Table S.5** Table of 159 segmented atlas structures. Columns of the table contain information for the coefficients estimates for the three-way or four-way interaction effects of sex, radiation, age and metformin treatment (MET19) and corresponding test statistics: p value (p) and FDR adjusted p values (q).
